# Supplementary material for: Insight into the inclusion of heteroatom impurities in silicon structures
Source: Royal Society of Chemistry journal article supplement (doi:10.1039/d2cp01493a), 2022-01-01
Supplement: d2cp01493a1.pdf [file d2cp01493a1.pdf]

## Supporting Information

# Insight into the inclusion of heteroatom impurities in Silicon structures

Rita Maji<sup>\*a</sup>, Eleonora Luppi<sup>b</sup>, Elena Degoli<sup>\*c,d,e</sup> and Julia Contreras-García<sup>\*b</sup>

<sup>a</sup> Dipartimento di Scienze e Metodi dell'Ingegneria, Università di Modena e Reggio Emilia, Via Amendola 2 Padiglione Tamburini, I-42122 Reggio Emilia, Italy

<sup>b</sup> Laboratoire de Chimie Théorique, Sorbonne Université and CNRS F-75005 Paris, France

<sup>c</sup> Dipartimento di Scienze e Metodi dell'Ingegneria, Università di Modena e Reggio Emilia, Via Amendola 2 Padiglione Morselli, I-42122 Reggio Emilia, Italy

<sup>d</sup> Centro Interdipartimentale En&Tech, Via Amendola 2 Padiglione Morselli, I-42122 Reggio Emilia, Italy

<sup>e</sup> Centro Interdipartimentale di Ricerca e per i Servizi nel settore della produzione, stoccaggio ed utilizzo dell'Idrogeno H2MO.RE., Via Università 4, 41121 Modena, Italy

\*email: rita.maji@unimore.it, elena.degoli@unimore.it, contrera@lct.jussieu.fr

## Contents

|          |                                                      |           |
|----------|------------------------------------------------------|-----------|
| <b>1</b> | <b>Reference systems</b>                             | <b>2</b>  |
| 1.1      | Bulk systems                                         | 2         |
| 1.2      | Molecular systems                                    | 2         |
| 1.3      | Silicon grain boundary without/with defects          | 2         |
| <b>2</b> | <b>Systems with interstitial carbon impurities</b>   | <b>3</b>  |
| 2.1      | Electronic properties                                | 3         |
| 2.2      | Bonding analysis                                     | 4         |
| <b>3</b> | <b>Systems with interstitial nitrogen impurities</b> | <b>9</b>  |
| 3.1      | Electronic properties                                | 9         |
| 3.2      | Bonding analysis                                     | 9         |
| <b>4</b> | <b>Systems with interstitial oxygen impurities</b>   | <b>14</b> |
| 4.1      | Electronic properties                                | 14        |
| 4.2      | Bonding analysis                                     | 14        |
| <b>5</b> | <b>Bond charge variations</b>                        | <b>19</b> |
| 5.1      | Nitrogen                                             | 19        |
| 5.2      | Oxygen                                               | 23        |
| <b>6</b> | <b>Bond length variations</b>                        | <b>27</b> |
| 6.1      | Carbon                                               | 27        |
| 6.2      | Nitrogen                                             | 29        |
| 6.3      | Oxygen                                               | 34        |

# 1 Reference systems

## 1.1 Bulk systems

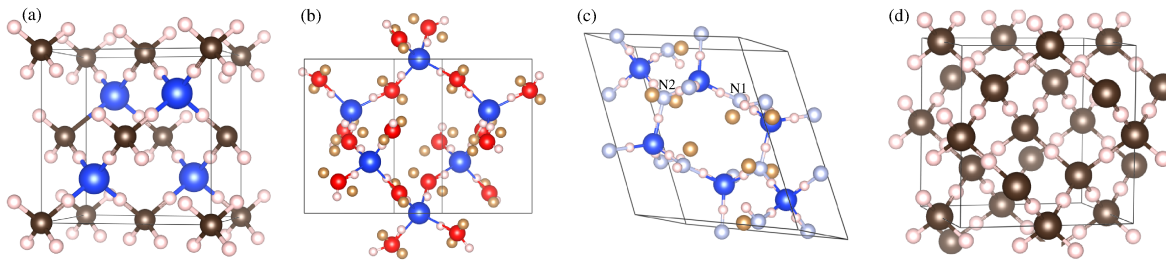

Figure 1: Bonds and lone pairs on (a) SiC (b) SiO<sub>2</sub> (c) Si<sub>3</sub>N<sub>4</sub> (d)Diamond

|                  | Si    | SiC   | SiO <sub>2</sub> | Si <sub>3</sub> N <sub>4</sub> | Diamond |
|------------------|-------|-------|------------------|--------------------------------|---------|
| Bond Charges(BC) | 1.999 | 2.000 | 1.908, 1.957     | 2.313                          | 1.999   |
| Bond length(BL)Å | 2.351 | 1.896 | 1.625, 1.628     | 1.747                          | 1.547   |
| Lone Pair(LP)    |       |       | 4.1340           | N2:(0.5289 each) 1.0578        |         |

Table 1: Bond charge(BC), bond length (BL) and lone pair(LP) data for Si-Si, Si-C, Si-O, Si-N and C-C bond from respective bulk systems:Si, SiC, SiO<sub>2</sub>, Si<sub>3</sub>N<sub>4</sub> and diamond.

## 1.2 Molecular systems

|                  | Ethane | Ethylene | Cyclopropane | Cyclopropene | Bicyclobutane |
|------------------|--------|----------|--------------|--------------|---------------|
| Bond Charges(BC) | 1.81   | 3.42     | 1.70         | 1.80, 3.20   | 1.87, 1.72    |
| Bond length(BL)Å | 1.53   | 1.33     | 1.52         | 1.53, 1.30   | 1.46, 1.55    |

Table 2: Bond charge(BC), bond length (BL) of molecular systems

## 1.3 Silicon grain boundary without/with defects

|           | Bond Charges(BC)                                                                                                               | Bond length(BL)Å                                                                                                                            | LP                     |
|-----------|--------------------------------------------------------------------------------------------------------------------------------|---------------------------------------------------------------------------------------------------------------------------------------------|------------------------|
| Si-GB     | 2.00329<br>2.00096<br>1.98795                                                                                                  | 2.35084<br>2.35122<br>2.36642                                                                                                               |                        |
| Si-GB: V1 | 2.0697<br>2.0138<br>2.0138<br>2.0192<br>2.0192<br>2.0712<br>2.0712<br>1.9712<br>2.0282<br>2.0062<br>2.0280<br>2.0280<br>1.5429 | 2.32564<br>2.37601<br>2.37601<br>2.36607<br>2.36607<br>2.31773<br>2.31773<br>2.42741<br>2.47125<br>2.50193<br>2.31424<br>2.31424<br>2.45097 | Si1: 0.99<br>Si2: 1.00 |
| Si-GB: V2 | 2.0172<br>2.0172<br>2.0609<br>2.0609<br>2.0676<br>2.0676<br>1.9926<br>1.9782<br>2.0207<br>2.0207<br>2.0273<br>2.0251<br>1.5522 | 2.37177<br>2.37177<br>2.32423<br>2.32423<br>2.32906<br>2.32906<br>2.35628<br>2.43172<br>2.43038<br>2.43038<br>2.48162<br>2.31610<br>2.44485 | Si1: 0.97<br>Si2: 1.03 |

Table 3: Bond charge(BC), bond length (BL) and lone pair(LP) data for Si-Si bond without/with vacancy defect on Si-GB.

## 2 Systems with interstitial carbon impurities

### 2.1 Electronic properties

| X  | $E_f^{XB}$ | $E_f^{XGB}$ | $E_f^{XV1GB}$ | $E_f^{XV2GB}$ |
|----|------------|-------------|---------------|---------------|
| 1C | 3.5467     | 3.5072      | -1.6935       | -1.8003       |
| 2C | 4.6315     | 4.3359      | 0.4985        | 0.2165        |
| 3C | 6.2242     | 5.2122      | 0.9758        | 0.8144        |
| 4C | 8.1596     | 7.6275      | 2.2861        | 2.1306        |

Table 4: Formation energy (eV) of Si bulk and  $\Sigma 3\{111\}$  Si GB without/with vacancies V1 and V2 with interstitial C atoms from 1 to 4. The values are reported for the lowest energy structures.

| X  | $E_g^{\text{Si-bulk}}$ | $E_g^{\text{GB}}$ | $E_g^{\text{V1GB}}$ | $E_g^{\text{V2GB}}$ |
|----|------------------------|-------------------|---------------------|---------------------|
| 1C | 0                      | 0.0477            | 0.3587              | 0.4014              |
| 2C | 0.4291                 | 0.5235            | 0                   | 0                   |
| 3C | 0.6944                 | 0.4729            | 0.6066              | 0.5578              |
| 4C | 0.4549                 | 0.1319            | 0.6502              | 0.5978              |

Table 5: Energy gaps (eV) of Si bulk and  $\Sigma 3\{111\}$  Si GB without/with vacancies V1 and V2 with interstitial C atoms from 1 to 4. The values are reported for the lowest energy structures.

| X  | $P(\text{X+B})$ | $P(\text{X+GB})$ | $P(\text{X+V1GB})$ | $P(\text{X+V2GB})$ |
|----|-----------------|------------------|--------------------|--------------------|
| 1C | 2.564           | 2.281            | 0.674              | 0.673              |
| 2C | 3.850           | 2.756            | 1.507              | 1.502              |
| 3C | 3.742           | 2.845            | 2.343              | 2.359              |
| 4C | 4.734           | 3.356            | 2.563              | 2.543              |

Table 6: Hydrostatic pressure (GPa) of Si bulk and  $\Sigma 3\{111\}$  Si GB without/with vacancies V1 and V2 with interstitial C atoms from 1 to 4. The values are reported for the lowest energy structures.

## 2.2 Bonding analysis

| Si-Bulk | BC(Si-Si)                                                                              | BL(Si-Si)Å                                                                                      | BC(Si-C)                                                 | BL(Si-C)Å                                                      | BC(C-C)                              | BL(C-C)Å                                 | LP          |
|---------|----------------------------------------------------------------------------------------|-------------------------------------------------------------------------------------------------|----------------------------------------------------------|----------------------------------------------------------------|--------------------------------------|------------------------------------------|-------------|
| 1C      | 1.9917<br>1.9916<br>1.9950<br>1.9948<br>2.2328<br>2.2350<br>1.9995                     | 2.31736<br>2.31759<br>2.31807<br>2.31842<br>2.28068<br>2.28173<br>2.44675                       | 2.4598<br>2.5371<br>2.3758                               | 1.81289<br>1.81233<br>1.74694                                  |                                      |                                          | 0.14269     |
| 2C      | 1.9779<br>1.9781<br>1.9779<br>1.9782<br>2.1463<br>2.1460<br>1.9930                     | 2.31447<br>2.31436<br>2.31428<br>2.31450<br>2.25425<br>2.25412<br>2.30624                       | 2.4845<br>2.4843<br>1.7554<br>1.7557                     | 1.78563<br>1.78585<br>1.84197<br>1.84192                       | 3.0651                               | 1.31413                                  |             |
| 3C      | 2.0201<br>2.0046<br>2.0047<br>2.0202<br>2.0693<br>2.0693<br>2.1675<br>1.9581<br>1.9577 | 2.31590<br>2.30954<br>2.30951<br>2.31584<br>2.34550<br>2.28606<br>2.20866<br>2.34297<br>2.34290 | 2.3825<br>2.3820<br>1.9941<br>1.9021<br>1.9028           | 1.81499<br>1.81535<br>1.87728<br>1.87268<br>1.87244            | 1.5792<br>1.5777<br>1.41599          | 1.53572<br>1.53568<br>1.50008            |             |
| 4C      | 1.9954<br>2.0178<br>2.0250<br>2.0650<br>2.0407<br>1.9946<br>1.9880<br>1.9545<br>1.9410 | 2.36665<br>2.32830<br>2.38233<br>2.26366<br>2.28754<br>2.30892<br>2.31720<br>2.34714<br>2.35165 | 2.2361<br>2.3127<br>2.2938<br>2.3754<br>1.9845<br>2.1936 | 1.84433<br>1.80898<br>1.85218<br>1.81756<br>1.86359<br>1.87557 | 2.1508<br>3.0399<br>1.7943<br>1.0551 | 1.41648<br>1.34593<br>1.46732<br>1.66790 | C3: 0.01604 |

Table 7: Bond charge(BC), bond length (BL) and lone pair(LP) data for Si-Si, Si-C and C-C bonds with the inclusion of n numbers of C atoms (n=1,2,3 & 4) in Si-bulk.

| Si-GB | BC(Si-Si) | BL(Si-Si)Å | BC(Si-C) | BL(Si-C)Å | BC(C-C) | BL(C-C)Å | LP           |
|-------|-----------|------------|----------|-----------|---------|----------|--------------|
| 1C    | 1.9903    | 2.31786    | 2.2747   | 1.81425   |         |          | 0.5948       |
|       | 2.0164    | 2.31981    | 2.2497   | 1.81470   |         |          |              |
|       | 1.9814    | 2.31807    | 2.4034   | 1.74762   |         |          |              |
|       | 2.2083    | 2.29283    |          |           |         |          |              |
|       | 2.0041    | 2.33252    |          |           |         |          |              |
|       | 2.2183    | 2.29363    |          |           |         |          |              |
|       | 2.0015    | 2.45067    |          |           |         |          |              |
|       |           |            |          |           |         |          |              |
| 2C    | 2.0507    | 2.37415    | 2.3492   | 1.83840   | 2.8306  | 1.37792  |              |
|       | 2.0595    | 2.36930    | 2.3430   | 1.84499   |         |          |              |
|       | 2.0793    | 2.27725    | 2.1074   | 1.86866   |         |          |              |
|       | 2.0129    | 2.29788    | 2.1091   | 1.86785   |         |          |              |
|       | 2.0158    | 2.29966    |          |           |         |          |              |
|       | 1.9780    | 2.34655    |          |           |         |          |              |
|       | 1.9662    | 2.35109    |          |           |         |          |              |
|       | 2.0841    | 2.26822    |          |           |         |          |              |
|       | 2.0117    | 2.34787    |          |           |         |          |              |
|       | 1.9379    | 2.31357    |          |           |         |          |              |
|       |           |            |          |           |         |          |              |
| 3C    | 2.0549    | 2.42702    | 2.2420   | 1.85243   | 1.5274  | 1.57712  | C3: 0.001514 |
|       | 2.0493    | 2.30263    | 2.2603   | 1.85057   |         |          |              |
|       | 2.0167    | 2.33603    | 2.2152   | 1.84016   |         |          |              |
|       | 2.0128    | 2.33161    | 2.1312   | 1.85078   |         |          |              |
|       | 2.0341    | 2.35625    | 2.1595   | 1.84555   |         |          |              |
|       | 2.0395    | 2.32409    | 1.8675   | 1.93941   |         |          |              |
|       | 2.0554    | 2.44381    | 1.8601   | 1.93139   |         |          |              |
|       | 1.9637    | 2.32060    | 1.8795   | 1.88733   |         |          |              |
|       | 2.2222    | 2.21525    | 1.6191   | 1.88109   |         |          |              |
|       |           |            | 1.5615   | 1.89062   |         |          |              |
|       |           |            |          |           |         |          |              |
| 4C    | 2.0053    | 2.31422    | 2.3129   | 1.83722   | 2.5353  | 1.39499  |              |
|       | 2.0744    | 2.32324    | 2.2215   | 1.87488   |         |          |              |
|       | 2.0044    | 2.33814    | 2.1408   | 1.89536   |         |          |              |
|       | 2.0281    | 2.36433    | 2.4743   | 1.78531   |         |          |              |
|       | 1.9727    | 2.34566    | 2.4729   | 1.78473   |         |          |              |
|       | 1.9471    | 2.32925    | 2.4820   | 1.80381   |         |          |              |
|       | 1.8315    | 2.48968    | 2.5122   | 1.77339   |         |          |              |
|       | 1.8336    | 2.44290    | 2.1517   | 1.79929   |         |          |              |
|       | 1.1289    | 2.57283    | 2.7127   | 1.75854   |         |          |              |
|       |           |            | 1.7269   | 1.95371   |         |          |              |
|       |           |            | 1.1668   | 2.03012   |         |          |              |
|       |           |            |          |           |         |          |              |
|       |           |            |          |           |         |          |              |

Table 8: Bond charge(BC), bond length (BL) and lone pair(LP) data for Si-Si, Si-C and C-C bonds with the inclusion of n numbers of C atoms (n=1,2,3 & 4) in Si-GB

|        | Si-VGB | BC(Si-Si) | BL(Si-Si)Å | BC(Si-C) | BL(Si-C)Å | BC(C-C) | BL(C-C)Å     | LP |
|--------|--------|-----------|------------|----------|-----------|---------|--------------|----|
| V1     | 1C     | 2.0243    | 2.39351    | 1.9629   | 1.99583   |         |              |    |
|        |        | 2.0242    | 2.39361    | 1.9526   | 2.00851   |         |              |    |
|        |        | 2.0205    | 2.39538    | 1.9201   | 2.03954   |         |              |    |
|        |        | 2.0289    | 2.39751    | 1.9199   | 2.03983   |         |              |    |
|        |        | 2.0210    | 2.40463    |          |           |         |              |    |
|        |        | 2.0211    | 2.40463    |          |           |         |              |    |
|        |        | 2.0291    | 2.39740    |          |           |         |              |    |
|        |        | 2.0115    | 2.34935    |          |           |         |              |    |
|        |        | 2.0237    | 2.40396    |          |           |         |              |    |
|        |        | 2.0115    | 2.34945    |          |           |         |              |    |
|        |        | 2.0238    | 2.40392    |          |           |         |              |    |
|        |        | 1.9847    | 2.34152    |          |           |         |              |    |
|        |        | 2.0026    | 2.46212    |          |           |         |              |    |
|        | 1.9689 | 2.42414   |            |          |           |         |              |    |
|        | 2C     | 2.0236    | 2.40835    | 2.4013   | 1.88745   | 2.3241  | 1.41529      |    |
|        |        | 2.0234    | 2.42022    | 2.4174   | 1.88984   |         |              |    |
|        |        | 2.0299    | 2.42408    | 2.4146   | 1.88913   |         |              |    |
|        |        | 2.0176    | 2.42635    | 2.4217   | 1.88409   |         |              |    |
|        |        | 2.0019    | 2.33929    |          |           |         |              |    |
|        |        | 2.0023    | 2.34743    |          |           |         |              |    |
|        |        | 2.0037    | 2.34256    |          |           |         |              |    |
|        |        | 1.9859    | 2.37766    |          |           |         |              |    |
|        |        | 1.9560    | 2.37192    |          |           |         |              |    |
|        |        | 1.9545    | 2.37375    |          |           |         |              |    |
|        | 3C     | 2.0355    | 2.32286    | 2.6560   | 1.80175   | 3.0039  | 1.31195      |    |
|        |        | 2.0148    | 2.39841    | 2.7033   | 1.80450   | 1.5660  | 1.51629      |    |
|        |        | 2.0329    | 2.29982    | 2.1869   | 1.89111   | 1.5181  | 1.52702      |    |
|        |        | 2.0273    | 2.33162    | 2.1780   | 1.90020   |         |              |    |
|        |        | 2.0332    | 2.32608    |          |           |         |              |    |
|        |        | 1.9774    | 2.32650    |          |           |         |              |    |
|        |        | 1.9799    | 2.34479    |          |           |         |              |    |
|        |        | 1.9779    | 2.34151    |          |           |         |              |    |
|        |        | 2.0099    | 2.42987    |          |           |         |              |    |
|        |        | 1.9848    | 2.31307    |          |           |         |              |    |
|        |        | 1.9863    | 2.37639    |          |           |         |              |    |
|        |        | 1.9979    | 2.37766    |          |           |         |              |    |
| 1.9875 |        | 2.37762   |            |          |           |         |              |    |
| 4C     | 2.0668 | 2.30703   | 2.3035     | 1.85418  | 1.6203    | 1.53713 | C1: 0.010741 |    |
|        | 2.0139 | 2.31936   | 2.5360     | 1.83508  | 1.6193    | 1.53703 | C3: 0.035845 |    |
|        | 2.0058 | 2.34112   | 2.5114     | 1.83507  | 1.5869    | 1.55733 | C3: 0.021072 |    |
|        | 2.0131 | 2.34511   | 2.3171     | 1.85991  | 1.5648    | 1.55739 |              |    |
|        | 2.0274 | 2.37703   | 2.0619     | 1.84544  | 1.3678    | 1.46903 |              |    |
|        | 2.0276 | 2.37684   | 2.0494     | 1.90386  |           |         |              |    |
|        | 2.0429 | 2.35443   |            |          |           |         |              |    |
|        | 2.0429 | 2.35446   |            |          |           |         |              |    |
|        | 2.0115 | 2.29645   |            |          |           |         |              |    |
|        | 2.0414 | 2.36713   |            |          |           |         |              |    |

Table 9: Bond charge(BC), bond length (BL) and lone pair(LP) data for Si-Si, Si-C and C-C bonds with the inclusion of n numbers of C atoms (n=1,2,3 & 4) in Si-GB with vacancy V1.

|        | Si-VGB  | BC(Si-Si) | BL(Si-Si)Å | BC(Si-C) | BL(Si-C)Å | BC(C-C) | BL(C-C)Å | LP     |         |  |
|--------|---------|-----------|------------|----------|-----------|---------|----------|--------|---------|--|
| V2     | 1C      | 2.0281    | 2.38089    | 1.9623   | 2.00709   |         |          |        |         |  |
|        |         | 2.0281    | 2.38089    | 1.9271   | 2.01777   |         |          |        |         |  |
|        |         | 2.0184    | 2.38908    | 1.9333   | 2.03516   |         |          |        |         |  |
|        |         | 2.0207    | 2.40451    | 1.9333   | 2.03516   |         |          |        |         |  |
|        |         | 2.0207    | 2.40451    |          |           |         |          |        |         |  |
|        |         | 2.0272    | 2.39927    |          |           |         |          |        |         |  |
|        |         | 2.0272    | 2.39927    |          |           |         |          |        |         |  |
|        |         | 2.0224    | 2.39941    |          |           |         |          |        |         |  |
|        |         | 2.0224    | 2.39941    |          |           |         |          |        |         |  |
|        |         | 2.0196    | 2.39996    |          |           |         |          |        |         |  |
|        |         | 2.0022    | 2.46209    |          |           |         |          |        |         |  |
|        |         | 2.0022    | 2.46209    |          |           |         |          |        |         |  |
| V2     | 2C      | 2.0119    | 2.32572    | 2.3918   | 1.89263   | 2.3152  | 1.41603  |        |         |  |
|        |         | 2.0235    | 2.40835    | 2.4065   | 1.89224   |         |          |        |         |  |
|        |         | 2.0171    | 2.42459    | 2.4949   | 1.87145   |         |          |        |         |  |
|        |         | 2.0034    | 2.32550    | 2.4071   | 1.88101   |         |          |        |         |  |
|        |         | 1.9984    | 2.38682    |          |           |         |          |        |         |  |
|        |         | 1.9612    | 2.35986    |          |           |         |          |        |         |  |
|        |         | 1.9912    | 2.33270    |          |           |         |          |        |         |  |
|        |         | 1.9641    | 2.41901    |          |           |         |          |        |         |  |
|        |         | 1.9530    | 2.37274    |          |           |         |          |        |         |  |
|        |         | 1.9518    | 2.37180    |          |           |         |          |        |         |  |
|        |         | V2        | 3C         | 2.0037   | 2.33228   | 2.6418  | 1.80187  | 2.9989 | 1.31248 |  |
|        |         |           |            | 1.9961   | 2.33392   | 2.7338  | 1.79859  | 1.5669 | 1.51368 |  |
| 1.9890 | 2.33664 |           |            | 2.1864   | 1.89848   | 1.5185  | 1.52813  |        |         |  |
| 2.0321 | 2.30156 |           |            | 2.1773   | 1.90683   |         |          |        |         |  |
| 2.0308 | 2.33111 |           |            |          |           |         |          |        |         |  |
| 2.0230 | 2.32828 |           |            |          |           |         |          |        |         |  |
| 2.0121 | 2.41445 |           |            |          |           |         |          |        |         |  |
| 2.0278 | 2.32947 |           |            |          |           |         |          |        |         |  |
| V2     | 4C      | 2.0689    | 2.31040    | 2.2894   | 1.86170   | 1.6442  | 1.53314  |        |         |  |
|        |         | 2.0040    | 2.33369    | 2.5498   | 1.83354   | 1.6105  | 1.53866  |        |         |  |
|        |         | 1.9870    | 2.32764    | 2.5521   | 1.84761   | 1.5948  | 1.55655  |        |         |  |
|        |         | 2.0023    | 2.33598    | 2.3272   | 1.86247   | 1.5870  | 1.55328  |        |         |  |
|        |         | 2.0042    | 2.33820    | 2.0410   | 1.84755   | 1.3498  | 1.47835  |        |         |  |
|        |         | 2.0345    | 2.35649    | 2.0608   | 1.90940   |         |          |        |         |  |
|        |         | 2.0533    | 2.31292    |          |           |         |          |        |         |  |
|        |         | 2.0063    | 2.33383    |          |           |         |          |        |         |  |
|        |         | 2.0353    | 2.34643    |          |           |         |          |        |         |  |

Table 10: Bond charge(BC), bond length (BL) and lone pair(LP) data for Si-Si, Si-C and C-C bonds with the inclusion of n numbers of C atoms (n=1,2,3 & 4) in Si-GB with vacancy V2.



### 3 Systems with interstitial nitrogen impurities

#### 3.1 Electronic properties

| X  | $E_f^{XB}$ | $E_f^{XGB}$ | $E_f^{XV1GB}$ | $E_f^{XV2GB}$ |
|----|------------|-------------|---------------|---------------|
| 1N | 1.8155     | 1.3127      | -0.8477       | -1.8618       |
| 2N | -0.7577    | -0.9272     | -1.5182       | -2.4698       |
| 3N | 0.5968     | -0.4488     | -1.8968       | -2.0912       |
| 4N | 1.2163     | -1.5700     | -3.0445       | -4.1177       |

Table 11: Formation energy (eV) of Si bulk and  $\Sigma 3\{111\}$  Si GB without/with vacancies V1 and V2 with interstitial N atoms from 1 to 4. The values are reported for the lowest energy structures.

| X  | $E_g^{Si-bulk}$ | $E_g^{GB}$ | $E_g^{V1GB}$ | $E_g^{V2GB}$ |
|----|-----------------|------------|--------------|--------------|
| 1N | 0               | 0          | 0            | 0            |
| 2N | 0.5427          | 0.5444     | 0.2439       | 0.6191       |
| 3N | 0               | 0          | 0            | 0            |
| 4N | 0.3464          | 0.6274     | 0.3966       | 0.6397       |

Table 12: Energy gaps (eV) of Si bulk and  $\Sigma 3\{111\}$  Si GB without/with vacancies V1 and V2 with interstitial N atoms from 1 to 4. The values are reported for the lowest energy structures.

| X  | $P(X+B)$ | $P(X+GB)$ | $P(X+V1GB)$ | $P(X+V2GB)$ |
|----|----------|-----------|-------------|-------------|
| 1N | 2.682    | 2.027     | 1.601       | 0.867       |
| 2N | 2.959    | 2.577     | 1.275       | 0.820       |
| 3N | 3.161    | 2.850     | 1.054       | 1.327       |
| 4N | 3.464    | 3.017     | 1.331       | 1.376       |

Table 13: Hydrostatic pressure (GPa) of Si bulk and  $\Sigma 3\{111\}$  Si GB without/with vacancies V1 and V2 with interstitial N atoms from 1 to 4. The values are reported for the lowest energy structures.

#### 3.2 Bonding analysis

| Si-Bulk | BC(Si-Si)                                                                    | BL(Si-Si)Å                                                                           | BC(Si-N)                                                                                                             | BL(Si-N)Å                                                                                                                        | BC(N-N) | BL(N-N)Å | LP                                                   |
|---------|------------------------------------------------------------------------------|--------------------------------------------------------------------------------------|----------------------------------------------------------------------------------------------------------------------|----------------------------------------------------------------------------------------------------------------------------------|---------|----------|------------------------------------------------------|
| 1N      | 2.0478<br>1.9314<br>1.9270<br>2.0029<br>2.0013<br>2.0181<br>1.9412<br>1.9427 | 2.33613<br>2.32035<br>2.32165<br>2.35253<br>2.35318<br>2.35985<br>2.33676<br>2.33660 | 2.4274<br>2.4141                                                                                                     | 1.66719<br>1.66703                                                                                                               |         |          | 2.4509                                               |
| 2N      | 2.0849<br>2.0843<br>2.0843<br>2.0849<br>2.0244<br>2.0239                     | 2.30713<br>2.30644<br>2.30645<br>2.30701<br>2.31767<br>2.31746                       | 2.2752<br>2.2956<br>2.0008<br>2.0007<br>2.0293<br>2.0508                                                             | 1.73464<br>1.73455<br>1.73999<br>1.73986<br>1.76801<br>1.76801                                                                   |         |          | N1: 1.4121<br>N2: 1.3700                             |
| 3N      | 2.0352<br>2.0792<br>2.0869<br>2.0827<br>2.0912<br>2.0617<br>2.0273<br>2.0109 | 2.28999<br>2.30490<br>2.31795<br>2.33198<br>2.30624<br>2.28782<br>2.31692<br>2.31369 | 2.2909<br>2.3008<br>1.9742<br>2.0136<br>1.9209<br>2.1595<br>1.8634<br>2.0166<br>1.8249                               | 1.73687<br>1.73777<br>1.74611<br>1.74460<br>1.76536<br>1.76647<br>1.73632<br>1.76668<br>1.78669                                  |         |          | N1: 0.7259<br>N2: 0.8651<br>N3: 1.9743               |
| 4N      | 2.0829<br>2.0801<br>2.0871<br>2.1036<br>2.1494<br>2.1334<br>1.9851           | 2.33553<br>2.32301<br>2.29693<br>2.30566<br>2.25315<br>2.35389<br>2.30198            | 2.3121<br>2.3443<br>2.0021<br>2.0234<br>1.9686<br>1.9389<br>2.2747<br>1.9527<br>2.0948<br>2.0943<br>1.9726<br>1.7351 | 1.73744<br>1.71281<br>1.75323<br>1.74916<br>1.75665<br>1.77627<br>1.72530<br>1.74615<br>1.76061<br>1.77118<br>1.73255<br>1.76306 |         |          | N1: 1.2854<br>N2: 1.3015<br>N3: 1.5256<br>N4: 1.9553 |

Table 14: Bond charge(BC), bond length (BL) and lone pair(LP) data for Si-Si, Si-N and N-N bonds with the inclusion of n numbers of N atoms (n=1,2,3 & 4) in Si-bulk.

| Si-GB | BC(Si-Si)                                                                    | BL(Si-Si)Å                                                                           | BC(Si-N)                                                                                                             | BL(Si-N)Å                                                                                                                        | BC(N-N) | BL(N-N)Å | LP                                                   |
|-------|------------------------------------------------------------------------------|--------------------------------------------------------------------------------------|----------------------------------------------------------------------------------------------------------------------|----------------------------------------------------------------------------------------------------------------------------------|---------|----------|------------------------------------------------------|
| 1N    | 2.0376<br>2.0375<br>2.0492<br>2.0493<br>2.0331<br>2.1035<br>2.1035<br>2.0271 | 2.32647<br>2.32636<br>2.32064<br>2.32045<br>2.45711<br>2.31514<br>2.31462<br>2.43737 | 2.0010<br>1.9200<br>1.7552                                                                                           | 1.76298<br>1.74187<br>1.76611                                                                                                    |         |          | 1.9985                                               |
| 2N    | 2.0834<br>2.0832<br>2.0883<br>2.0881<br>2.0104<br>2.0247                     | 2.31385<br>2.31385<br>2.31135<br>2.31135<br>2.31162<br>2.32479                       | 2.3180<br>2.5108<br>2.1484<br>2.0497<br>1.9979<br>1.9923                                                             | 1.73044<br>1.72975<br>1.74457<br>1.74220<br>1.77111<br>1.76485                                                                   |         |          | N1: 1.3607<br>N2: 1.0621                             |
| 3N    | 2.1013<br>2.0927<br>2.0902<br>2.0275<br>2.0207<br>2.0532                     | 2.29004<br>2.31424<br>2.30417<br>2.32465<br>2.33297<br>2.35819                       | 2.1939<br>2.2970<br>2.6832<br>2.4427<br>2.2157<br>2.1275<br>2.0487<br>1.8478<br>1.9054                               | 1.74968<br>1.72659<br>1.71560<br>1.74610<br>1.74352<br>1.73394<br>1.71729<br>1.75508<br>1.79481                                  |         |          | N1: 1.1192<br>N2: 1.2278<br>N3: 1.1573               |
| 4N    | 2.1249<br>2.0931<br>2.0432<br>2.0634<br>2.0821<br>2.0068                     | 2.27680<br>2.30091<br>2.30684<br>2.30310<br>2.34419<br>2.31122                       | 2.4731<br>2.1082<br>2.3015<br>2.4608<br>2.3014<br>2.0111<br>2.1785<br>2.2933<br>1.9397<br>2.0967<br>1.9236<br>1.9361 | 1.73868<br>1.76076<br>1.72478<br>1.72397<br>1.74044<br>1.75477<br>1.74475<br>1.78921<br>1.77425<br>1.73882<br>1.77890<br>1.77797 |         |          | N1: 1.4252<br>N2: 1.0691<br>N3: 1.1897<br>N4: 1.2506 |

Table 15: Bond charge(BC), bond length (BL) and lone pair(LP) data for Si-Si, Si-N and N-N bonds with the inclusion of n numbers of N atoms (n=1,2,3 & 4) in Si-GB.

|        | Si-VGB | BC(Si-Si) | BL(Si-Si)Å | BC(Si-N) | BL(Si-N)Å | BC(N-N) | BL(N-N)Å | LP                       |                                                      |                                        |
|--------|--------|-----------|------------|----------|-----------|---------|----------|--------------------------|------------------------------------------------------|----------------------------------------|
| V1     | 1N     | 2.0247    | 2.41953    | 2.3100   | 1.69449   |         |          | 2.9121                   |                                                      |                                        |
|        |        | 2.0197    | 2.43623    | 2.2639   | 1.69582   |         |          |                          |                                                      |                                        |
|        |        | 2.0010    | 2.35263    |          |           |         |          |                          |                                                      |                                        |
|        |        | 2.0038    | 2.34135    |          |           |         |          |                          |                                                      |                                        |
|        |        | 2.0009    | 2.35266    |          |           |         |          |                          |                                                      |                                        |
|        |        | 1.9653    | 2.38943    |          |           |         |          |                          |                                                      |                                        |
|        |        | 1.9649    | 2.38938    |          |           |         |          |                          |                                                      |                                        |
|        |        | 2.0462    | 2.30787    |          |           |         |          |                          |                                                      |                                        |
|        |        | 1.9577    | 2.38419    |          |           |         |          |                          |                                                      |                                        |
|        |        | 1.9570    | 2.38426    |          |           |         |          |                          |                                                      |                                        |
|        |        | 2.0887    | 2.32091    |          |           |         |          |                          |                                                      |                                        |
|        |        | 2.0894    | 2.31500    |          |           |         |          |                          |                                                      |                                        |
|        |        | 1.9718    | 2.30958    |          |           |         |          |                          |                                                      |                                        |
|        | 2N     | 2.0434    | 2.34686    | 1.7099   | 1.80391   | 1.0824  | 1.45049  | N1: 2.8568<br>N2: 3.1440 |                                                      |                                        |
|        |        | 2.0256    | 2.41936    | 1.6528   | 1.80577   |         |          |                          |                                                      |                                        |
|        |        | 2.0453    | 2.34935    | 1.5105   | 1.83934   |         |          |                          |                                                      |                                        |
|        |        | 2.0452    | 2.34960    | 1.5587   | 1.83902   |         |          |                          |                                                      |                                        |
|        |        | 2.0501    | 2.33689    |          |           |         |          |                          |                                                      |                                        |
|        |        | 2.0484    | 2.35730    |          |           |         |          |                          |                                                      |                                        |
|        |        | 2.0241    | 2.44403    |          |           |         |          |                          |                                                      |                                        |
|        |        | 2.0094    | 2.34903    |          |           |         |          |                          |                                                      |                                        |
|        |        | 1.9838    | 2.33999    |          |           |         |          |                          |                                                      |                                        |
|        |        | 1.9960    | 2.55257    |          |           |         |          |                          |                                                      |                                        |
|        |        | 3N        | 2.0773     | 2.41155  | 2.3000    | 1.73292 |          |                          |                                                      | N1: 2.0548<br>N2: 2.7514<br>N3: 1.4688 |
|        |        |           | 2.0422     | 2.37194  | 1.9799    | 1.82098 |          |                          |                                                      |                                        |
|        |        |           | 2.0225     | 2.33420  | 1.9268    | 1.78660 |          |                          |                                                      |                                        |
|        | 2.0439 |           | 2.40624    | 2.3839   | 1.68197   |         |          |                          |                                                      |                                        |
|        | 1.9813 |           | 2.31695    | 1.9969   | 1.79269   |         |          |                          |                                                      |                                        |
|        | 2.0262 |           | 2.37227    | 2.3275   | 1.70177   |         |          |                          |                                                      |                                        |
|        | 2.0281 |           | 2.42340    | 1.9324   | 1.81505   |         |          |                          |                                                      |                                        |
|        | 2.0372 |           | 2.40966    | 1.7521   | 1.84096   |         |          |                          |                                                      |                                        |
|        | 2.0574 |           | 2.48591    |          |           |         |          |                          |                                                      |                                        |
|        | 4N     |           | 2.1485     | 2.46424  | 2.0854    | 1.74349 |          |                          | N1: 1.8152<br>N2: 1.2873<br>N3: 1.2731<br>N4: 2.2097 |                                        |
|        |        | 2.0467    | 2.35171    | 2.0270   | 1.73643   |         |          |                          |                                                      |                                        |
|        |        | 2.0365    | 2.42135    | 2.0928   | 1.77086   |         |          |                          |                                                      |                                        |
|        |        | 2.0349    | 2.38921    | 2.1196   | 1.75251   |         |          |                          |                                                      |                                        |
| 2.0348 |        | 2.41911   | 1.9919     | 1.77712  |           |         |          |                          |                                                      |                                        |
| 2.0138 |        | 2.36413   | 2.0611     | 1.79525  |           |         |          |                          |                                                      |                                        |
| 1.9812 |        | 2.32272   | 2.0450     | 1.79535  |           |         |          |                          |                                                      |                                        |
| 2.0344 |        | 2.49119   | 1.8110     | 1.76966  |           |         |          |                          |                                                      |                                        |
|        |        |           | 2.2998     | 1.80866  |           |         |          |                          |                                                      |                                        |
|        |        |           | 1.8331     | 1.84124  |           |         |          |                          |                                                      |                                        |
|        |        |           | 2.3149     | 1.77682  |           |         |          |                          |                                                      |                                        |
|        |        |           | 1.6849     | 1.80845  |           |         |          |                          |                                                      |                                        |

Table 16: Bond charge(BC), bond length (BL) and lone pair(LP) data for Si-Si, Si-N and N-N bonds with the inclusion of n numbers of N atoms (n=1,2,3 & 4) in Si-GB with vacancy V1.

|        | Si-VGB | BC(Si-Si) | BL(Si-Si)Å | BC(Si-N) | BL(Si-N)Å | BC(N-N) | BL(N-N)Å | LP                                                   |
|--------|--------|-----------|------------|----------|-----------|---------|----------|------------------------------------------------------|
| V2     | 1N     | 2.0564    | 2.36784    | 1.9553   | 1.87247   |         |          | N: 1.6904<br>Si: 0.4432                              |
|        |        | 2.0509    | 2.40413    | 1.9558   | 1.87367   |         |          |                                                      |
|        |        | 2.0493    | 2.40528    | 1.9353   | 1.86030   |         |          |                                                      |
|        |        | 2.0511    | 2.38624    |          |           |         |          |                                                      |
|        |        | 2.0483    | 2.38886    |          |           |         |          |                                                      |
|        |        | 1.9908    | 2.40434    |          |           |         |          |                                                      |
|        |        | 1.9654    | 2.40723    |          |           |         |          |                                                      |
|        |        | 2.1537    | 2.33401    |          |           |         |          |                                                      |
|        |        | 2.1767    | 2.33784    |          |           |         |          |                                                      |
|        |        | 2.2444    | 2.32922    |          |           |         |          |                                                      |
|        | 2N     | 2.0061    | 2.31947    | 2.0590   | 1.76352   |         |          | N1: 1.8892<br>N2: 1.9015                             |
|        |        | 2.0063    | 2.31967    | 2.0490   | 1.76331   |         |          |                                                      |
|        |        | 2.0476    | 2.36605    | 1.9409   | 1.80508   |         |          |                                                      |
|        |        | 2.0227    | 2.33318    | 1.9121   | 1.80526   |         |          |                                                      |
|        |        | 2.0426    | 2.45558    | 1.7975   | 1.82537   |         |          |                                                      |
|        |        | 2.0550    | 2.53332    | 1.7913   | 1.82514   |         |          |                                                      |
|        |        | 2.0549    | 2.53382    |          |           |         |          |                                                      |
|        |        | 2.0252    | 2.36235    | 2.4391   | 1.75975   |         |          |                                                      |
|        |        | 2.0156    | 2.33604    | 1.9526   | 1.77458   |         |          |                                                      |
|        |        | 2.0422    | 2.35106    | 2.7003   | 1.65230   |         |          |                                                      |
|        | 3N     | 2.0451    | 2.35443    | 1.9947   | 1.77620   |         |          | N1: 1.2519<br>N2: 2.1413<br>N3: 2.1548               |
|        |        | 2.0241    | 2.38609    | 2.0178   | 1.78340   |         |          |                                                      |
|        |        | 2.0507    | 2.43521    | 2.5160   | 1.66644   |         |          |                                                      |
|        |        | 2.0473    | 2.41717    | 1.8130   | 1.79287   |         |          |                                                      |
|        |        | 2.0488    | 2.51035    | 1.7839   | 1.81480   |         |          |                                                      |
|        |        | 2.0415    | 2.51595    |          |           |         |          |                                                      |
|        |        | 1.7991    | 2.35569    |          |           |         |          |                                                      |
|        |        | 2.0319    | 2.28568    | 2.2734   | 1.73678   |         |          |                                                      |
|        |        | 2.1039    | 2.42680    | 2.1041   | 1.75573   |         |          |                                                      |
|        |        | 2.0438    | 2.26015    | 2.1349   | 1.76866   |         |          |                                                      |
|        | 4N     | 2.0431    | 2.35302    | 2.0410   | 1.74235   |         |          | N1: 1.8719<br>N2: 1.3477<br>N3: 1.2853<br>N4: 2.0208 |
|        |        | 2.0439    | 2.35439    | 2.4054   | 1.75972   |         |          |                                                      |
|        |        | 2.0269    | 2.37705    | 1.9884   | 1.77301   |         |          |                                                      |
|        |        | 1.9962    | 2.33643    | 2.0737   | 1.76081   |         |          |                                                      |
|        |        | 2.0385    | 2.42899    | 1.9729   | 1.78870   |         |          |                                                      |
|        |        | 2.0439    | 2.42410    | 1.8965   | 1.77478   |         |          |                                                      |
| 2.0702 |        | 2.47255   | 1.9491     | 1.77956  |           |         |          |                                                      |
| 2.0709 |        | 2.51903   | 1.8610     | 1.79077  |           |         |          |                                                      |
| 2.0000 |        | 2.46747   | 1.7530     | 1.80498  |           |         |          |                                                      |

Table 17: Bond charge(BC), bond length (BL) and lone pair(LP) data for Si-Si, Si-N and N-N bonds with the inclusion of n numbers of N atoms (n=1,2,3 & 4) in Si-GB with vacancy V2.

## 4 Systems with interstitial oxygen impurities

### 4.1 Electronic properties

| X  | $E_f^{XB}$ | $E_f^{XGB}$ | $E_f^{XV1GB}$ | $E_f^{XV2GB}$ |
|----|------------|-------------|---------------|---------------|
| 1O | -2.3649    | -2.3950     | -4.3281       | -4.3036       |
| 2O | -5.2126    | -5.2515     | -7.9224       | -7.8855       |
| 3O | -8.3195    | -8.3974     | -11.2368      | -11.2213      |
| 4O | -11.0994   | -11.1843    | -14.2579      | -14.5924      |

Table 18: Formation energy (eV) of Si bulk and  $\Sigma 3\{111\}$  Si GB without/with vacancies V1 and V2 with interstitial O atoms from 1 to 4. The values are reported for the lowest energy structures.

| X  | $E_g^{Si-bulk}$ | $E_g^{GB}$ | $E_g^{V1GB}$ | $E_g^{V2GB}$ |
|----|-----------------|------------|--------------|--------------|
| 1O | 0.6086          | 0.5506     | 0.6274       | 0.6283       |
| 2O | 0.5913          | 0.6073     | 0.6353       | 0.6292       |
| 3O | 0.7285          | 0.6185     | 0.6306       | 0.6319       |
| 4O | 0.7430          | 0.5569     | 0.6850       | 0.6989       |

Table 19: Energy gaps (eV) of Si bulk and  $\Sigma 3\{111\}$  Si GB without/with vacancies V1 and V2 with interstitial O atoms from 1 to 4. The values are reported for the lowest energy structures.

| X  | $P(X+B)$ | $P(X+GB)$ | $P(X+V1GB)$ | $P(X+V2GB)$ |
|----|----------|-----------|-------------|-------------|
| 1O | 2.776    | 2.413     | 1.697       | 1.692       |
| 2O | 3.157    | 2.660     | 2.325       | 2.282       |
| 3O | 3.479    | 2.864     | 2.981       | 2.616       |
| 4O | 4.121    | 3.064     | 3.171       | 2.849       |

Table 20: Hydrostatic pressure (GPa) of Si bulk and  $\Sigma 3\{111\}$  Si GB without/with vacancies V1 and V2 with interstitial O atoms from 1 to 4. The values are reported for the lowest energy structures.

### 4.2 Bonding analysis

| Si-Bulk | BC(Si-Si) | BL(Si-Si)Å | BC(Si-O) | BL(Si-O)Å | LP         |
|---------|-----------|------------|----------|-----------|------------|
| 1O      | 1.9918    | 2.32115    | 1.7489   | 1.63550   | O1: 4.283  |
|         | 2.0069    | 2.32194    | 1.7479   | 1.63423   |            |
|         | 2.0467    | 2.32461    |          |           |            |
|         | 2.0555    | 2.32523    |          |           |            |
| 2O      | 2.0789    | 2.30065    | 1.8939   | 1.64273   | O1: 4.2801 |
|         | 2.0795    | 2.30074    | 1.7391   | 1.66098   | O2: 4.3145 |
|         | 2.0221    | 2.32101    | 1.7493   | 1.63986   |            |
|         | 1.9685    | 2.31220    | 1.5902   | 1.67594   |            |
|         | 2.0680    | 2.33876    |          |           |            |
|         | 2.0681    | 2.33886    |          |           |            |
|         | 2.0950    | 2.33589    |          |           |            |
| 3O      | 2.1373    | 2.24814    | 1.9606   | 1.62698   | O1: 4.3299 |
|         | 1.9904    | 2.30827    | 1.9473   | 1.62684   | O2: 4.3404 |
|         | 2.0606    | 2.33173    | 1.9752   | 1.62684   | O3: 4.3299 |
|         | 2.0602    | 2.33169    | 1.5148   | 1.68729   |            |
|         | 2.0598    | 2.33175    | 1.5429   | 1.68740   |            |
|         | 2.0714    | 2.35013    | 1.5191   | 1.68737   |            |
|         | 2.0710    | 2.34967    |          |           |            |
| 4O      | 2.0971    | 2.22921    | 1.9675   | 1.63190   | O1: 4.2585 |
|         | 2.0108    | 2.32069    | 1.9450   | 1.62957   | O2: 4.1269 |
|         | 2.0322    | 2.32228    | 1.9281   | 1.62211   | O3: 4.2659 |
|         | 1.9837    | 2.30422    | 1.7651   | 1.66014   | O4: 4.3555 |
|         | 2.0497    | 2.33004    | 1.7301   | 1.63470   |            |
|         | 2.0734    | 2.34109    | 1.7331   | 1.65317   |            |
|         |           |            | 1.6537   | 1.66647   |            |
|         |           |            | 1.5824   | 1.68762   |            |

Table 21: Bond charge(BC), bond length (BL) and lone pair(LP) data for Si-Si and Si-O bonds with the inclusion of n numbers of O atoms (n=1,2,3 & 4) in Si-bulk.

| Si-GB  | BC(Si-Si) | BL(Si-Si)Å | BC(Si-O) | BL(Si-O)Å | LP                                                   |
|--------|-----------|------------|----------|-----------|------------------------------------------------------|
| 1O     | 2.0093    | 2.32532    | 1.7792   | 1.63913   | 4.2934                                               |
|        | 1.9902    | 2.32383    | 1.7035   | 1.63789   |                                                      |
|        | 2.0134    | 2.33911    |          |           |                                                      |
|        | 2.0425    | 2.32990    |          |           |                                                      |
|        | 2.0564    | 2.32704    |          |           |                                                      |
|        | 2.0781    | 2.32612    |          |           |                                                      |
|        | 1.9997    | 2.32640    |          |           |                                                      |
|        | 1.9931    | 2.34696    |          |           |                                                      |
|        | 1.9959    | 2.36746    |          |           |                                                      |
| 2O     | 2.0872    | 2.31206    | 1.9142   | 1.64514   | O1: 4.3003<br>O2: 4.3380                             |
|        | 2.0250    | 2.32108    | 1.7951   | 1.64091   |                                                      |
|        | 2.0197    | 2.32159    | 1.7078   | 1.66111   |                                                      |
|        | 2.0920    | 2.31034    | 1.5149   | 1.67498   |                                                      |
|        | 2.0950    | 2.33289    |          |           |                                                      |
|        | 2.0132    | 2.35452    |          |           |                                                      |
|        | 2.0226    | 2.32704    |          |           |                                                      |
|        | 1.9877    | 2.36383    |          |           |                                                      |
|        | 1.9847    | 2.32704    |          |           |                                                      |
| 1.9957 | 2.35741   |            |          |           |                                                      |
| 3O     | 2.1448    | 2.25427    | 1.9600   | 1.62934   | O1: 4.2309<br>O2: 4.3284<br>O3: 4.3491               |
|        | 2.1231    | 2.28737    | 2.0395   | 1.62583   |                                                      |
|        | 2.0699    | 2.34079    | 1.9255   | 1.63628   |                                                      |
|        | 2.0687    | 2.36253    | 1.5670   | 1.68212   |                                                      |
|        | 2.0445    | 2.33292    | 1.5497   | 1.68240   |                                                      |
|        | 2.0624    | 2.34653    | 1.5057   | 1.69960   |                                                      |
|        | 1.9502    | 2.32814    |          |           |                                                      |
|        | 1.9914    | 2.33156    |          |           |                                                      |
|        | 1.9873    | 2.33906    |          |           |                                                      |
| 4O     | 1.9968    | 2.30698    | 2.1162   | 1.60775   | O1: 4.1798<br>O2: 4.3162<br>O3: 4.4751<br>O4: 4.3444 |
|        | 2.0109    | 2.31411    | 1.9557   | 1.60825   |                                                      |
|        | 2.0089    | 2.29839    | 2.0040   | 1.60321   |                                                      |
|        | 2.0324    | 2.32370    | 1.9907   | 1.61242   |                                                      |
|        | 2.0459    | 2.36708    | 1.5109   | 1.69476   |                                                      |
|        | 2.0352    | 2.32384    | 1.5546   | 1.69474   |                                                      |
|        | 2.0739    | 2.37431    | 1.5502   | 1.69645   |                                                      |
|        | 2.1489    | 2.29031    | 1.4290   | 1.71093   |                                                      |
|        | 1.9766    | 2.33417    |          |           |                                                      |

Table 22: Bond charge(BC), bond length (BL) and lone pair(LP) data for Si-Si and Si-O bonds with the inclusion of n numbers of O atoms (n=1,2,3 & 4) in Si-GB



|        | Si-VGB  | BC(Si-Si) | BL(Si-Si)Å | BC(Si-O) | BL(Si-O)Å | LP                                                   |
|--------|---------|-----------|------------|----------|-----------|------------------------------------------------------|
| V1     | 1O      | 2.0433    | 2.35933    | 1.5763   | 1.70276   | 4.8177                                               |
|        |         | 2.0432    | 2.35930    | 1.4038   | 1.70352   |                                                      |
|        |         | 2.0504    | 2.34937    |          |           |                                                      |
|        |         | 2.0503    | 2.34933    |          |           |                                                      |
|        |         | 2.0493    | 2.41995    |          |           |                                                      |
|        |         | 2.0374    | 2.44706    |          |           |                                                      |
|        |         | 2.0781    | 2.32314    |          |           |                                                      |
|        |         | 2.0788    | 2.31593    |          |           |                                                      |
|        |         | 2.0029    | 2.31171    |          |           |                                                      |
|        |         | 2O        | 2.0854     | 2.34609  | 1.8687    |                                                      |
|        | 2.0853  |           | 2.34610    | 1.6492   | 1.68177   |                                                      |
|        | 1.9984  |           | 2.31011    | 1.7409   | 1.66199   |                                                      |
|        | 2.0531  |           | 2.38759    | 1.6583   | 1.66506   |                                                      |
|        | 2.0612  |           | 2.35561    |          |           |                                                      |
|        | 2.0613  |           | 2.35561    |          |           |                                                      |
|        | 2.0745  |           | 2.32627    |          |           |                                                      |
|        | 2.0759  |           | 2.32289    |          |           |                                                      |
|        | 2.0046  |           | 2.31500    |          |           |                                                      |
|        | 1.5825  |           | 2.45085    |          |           |                                                      |
|        | 3O      | 2.0851    | 2.31788    | 1.8948   | 1.62656   | O1: 4.2695<br>O2: 4.1855<br>O3: 4.3248               |
|        |         | 2.0886    | 2.32236    | 1.8150   | 1.63978   |                                                      |
|        |         | 2.0016    | 2.31408    | 1.7386   | 1.62749   |                                                      |
|        |         | 2.0592    | 2.34710    | 1.7672   | 1.63987   |                                                      |
|        |         | 2.0592    | 2.34711    | 1.7558   | 1.65652   |                                                      |
|        |         | 2.0446    | 2.31293    | 1.7408   | 1.65403   |                                                      |
|        |         | 2.0107    | 2.32353    |          |           |                                                      |
|        |         | 1.9913    | 2.34144    |          |           |                                                      |
|        |         | 1.9769    | 2.33572    |          |           |                                                      |
|        |         | 2.0050    | 2.31155    |          |           |                                                      |
|        | 4O      | 2.1503    | 2.27352    | 2.0133   | 1.62843   | O1: 4.1015<br>O2: 4.1822<br>O3: 4.2785<br>O4: 4.2594 |
|        |         | 2.0809    | 2.31442    | 1.8618   | 1.62652   |                                                      |
|        |         | 2.0001    | 2.31435    | 1.8409   | 1.64666   |                                                      |
|        |         | 1.9944    | 2.30186    | 1.7146   | 1.66121   |                                                      |
|        |         | 2.0569    | 2.32987    | 1.9526   | 1.62095   |                                                      |
|        |         | 2.0262    | 2.30338    | 1.8908   | 1.62452   |                                                      |
|        |         | 2.0582    | 2.34486    | 1.7483   | 1.65339   |                                                      |
| 2.0608 |         | 2.34711   | 1.5363     | 1.69373  |           |                                                      |
| 2.0576 |         | 2.38358   |            |          |           |                                                      |
| 2.0007 |         | 2.33742   |            |          |           |                                                      |
| 1.9774 | 2.34089 |           |            |          |           |                                                      |

Table 23: Bond charge(BC), bond length (BL) and lone pair(LP) data for Si-Si and Si-O bonds with the inclusion of n numbers of O atoms (n=1,2,3 & 4) in Si-GB with vacancy V1.

|        | Si-VGB | BC(Si-Si) | BL(Si-Si)Å | BC(Si-O) | BL(Si-O)Å                                            | LP                       |
|--------|--------|-----------|------------|----------|------------------------------------------------------|--------------------------|
| V2     | 1O     | 2.0490    | 2.35202    | 1.5907   | 1.70536                                              | 4.7927                   |
|        |        | 2.0490    | 2.35202    | 1.4133   | 1.70324                                              |                          |
|        |        | 2.0389    | 2.34423    |          |                                                      |                          |
|        |        | 2.0479    | 2.39899    |          |                                                      |                          |
|        |        | 2.0479    | 2.39899    |          |                                                      |                          |
|        |        | 2.0459    | 2.42851    |          |                                                      |                          |
|        |        | 2.0673    | 2.32292    |          |                                                      |                          |
|        |        | 2.0017    | 2.31335    |          |                                                      |                          |
|        |        | 1.5752    | 2.43705    |          |                                                      |                          |
|        | 2O     | 2.0916    | 2.34935    | 1.7851   | 1.63329                                              | O1: 4.3862<br>O2: 4.3375 |
|        |        | 2.0916    | 2.34935    | 1.6953   | 1.66673                                              |                          |
|        |        | 2.0257    | 2.32115    | 1.7470   | 1.68194                                              |                          |
|        |        | 2.0257    | 2.32115    | 1.6959   | 1.66639                                              |                          |
|        |        | 2.0504    | 2.36999    |          |                                                      |                          |
|        |        | 2.0504    | 2.36999    |          |                                                      |                          |
|        |        | 2.0360    | 2.33241    |          |                                                      |                          |
| 2.0735 |        | 2.37747   |            |          |                                                      |                          |
| 2.0611 |        | 2.32703   |            |          |                                                      |                          |
| 3O     | 2.0823 | 2.30486   | 1.8844     | 1.65237  | O1: 4.4063<br>O2: 4.2758<br>O3: 4.3626               |                          |
|        | 2.0826 | 2.30432   | 1.7179     | 1.64360  |                                                      |                          |
|        | 2.0494 | 2.35862   | 1.6933     | 1.64503  |                                                      |                          |
|        | 2.0494 | 2.35862   | 1.7372     | 1.66772  |                                                      |                          |
|        | 2.0304 | 2.32693   | 1.7276     | 1.66736  |                                                      |                          |
|        | 2.0309 | 2.32429   | 1.6871     | 1.65621  |                                                      |                          |
|        | 2.0363 | 2.30348   |            |          |                                                      |                          |
|        | 1.9855 | 2.32768   |            |          |                                                      |                          |
|        | 2.0048 | 2.31078   |            |          |                                                      |                          |
| 4O     | 2.1604 | 2.33661   | 1.8891     | 1.63356  | O1: 4.2751<br>O2: 4.1492<br>O3: 4.3613<br>O4: 4.1261 |                          |
|        | 2.0939 | 2.32015   | 1.9768     | 1.61832  |                                                      |                          |
|        | 2.0371 | 2.34213   | 1.8987     | 1.64051  |                                                      |                          |
|        | 2.0210 | 2.31449   | 1.8329     | 1.66554  |                                                      |                          |
|        | 2.0529 | 2.36183   | 1.7697     | 1.64925  |                                                      |                          |
|        | 2.0454 | 2.35171   | 1.7404     | 1.65316  |                                                      |                          |
|        | 2.0487 | 2.34450   | 1.6899     | 1.67462  |                                                      |                          |
|        | 2.0529 | 2.32527   | 1.6799     | 1.67034  |                                                      |                          |
|        | 2.0686 | 2.32756   |            |          |                                                      |                          |
|        | 2.0095 | 2.32386   |            |          |                                                      |                          |
|        | 1.6214 | 2.41121   |            |          |                                                      |                          |

Table 24: Bond charge(BC), bond length (BL) and lone pair(LP) data for Si-Si and Si-O bonds for the inclusion of n numbers of O atoms (n=1,2,3 & 4) in Si-GB with vacancy V2.

## 5 Bond charge variations

### 5.1 Nitrogen

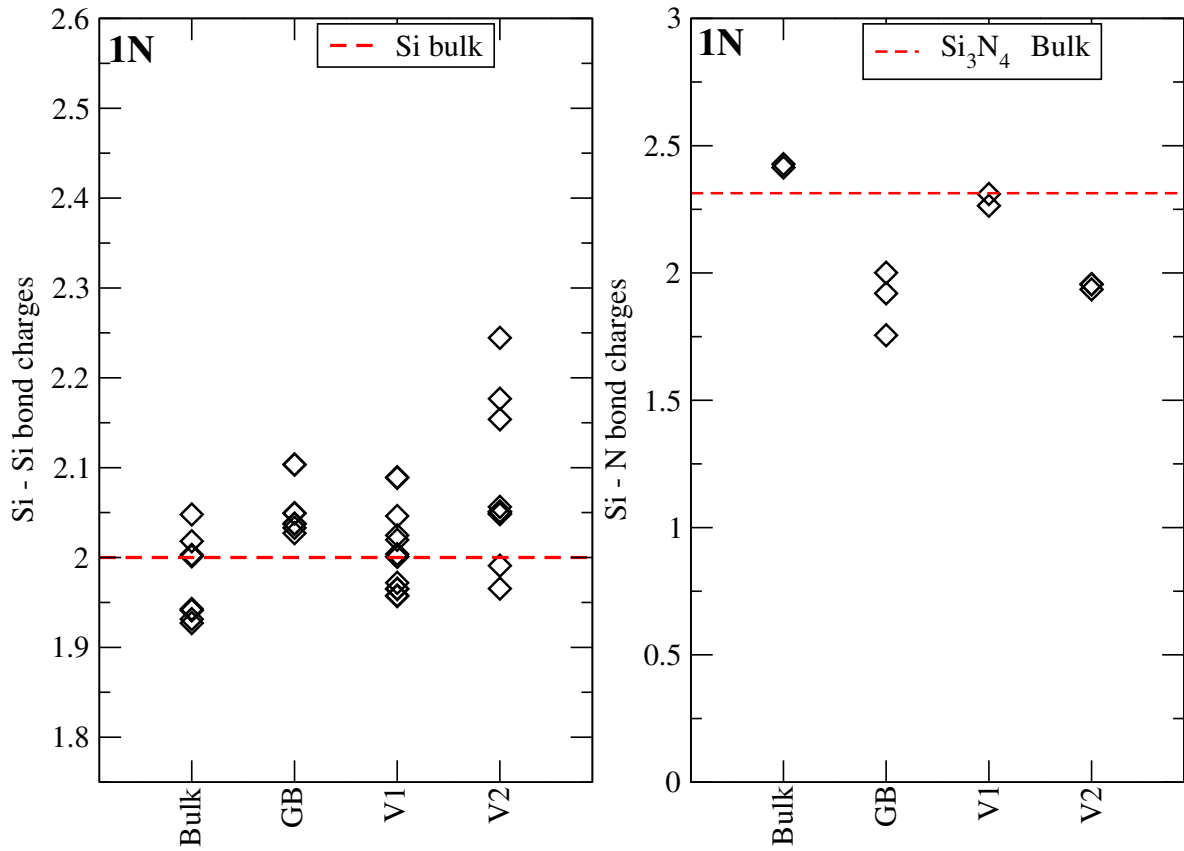

Figure 2: Bond charge variation of Si-Si and Si-N with the inclusion of one nitrogen atom in Si-bulk, Si-GB and in presence of vacancy V1 and V2. As a reference, Si-Si/Si-N bond charges from bulk phases of Si and  $\text{Si}_3\text{N}_4$  are marked in the inset of respective plots.

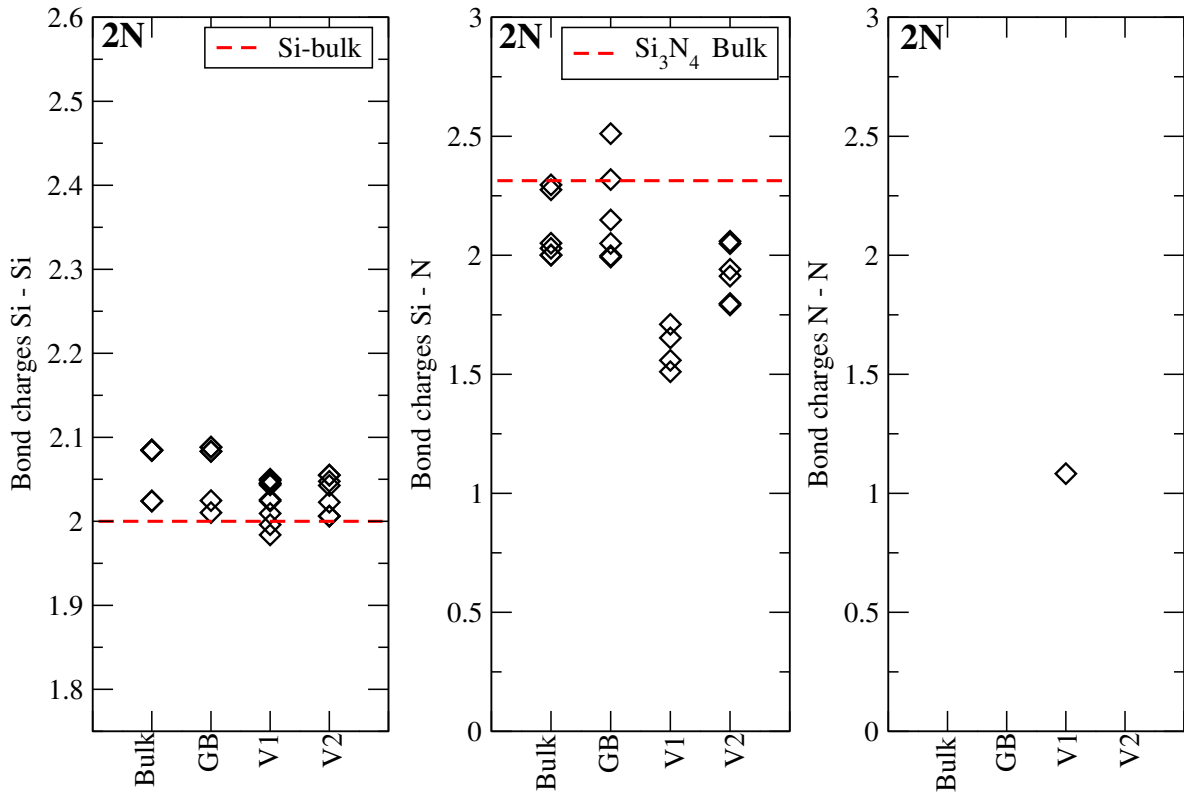

Figure 3: Bond charge variation of Si-Si, Si-N and N-N for the inclusion of two nitrogen atoms in Si-bulk, Si-GB and in presence of vacancy V1 and V2. As a reference, Si-Si/Si-N bond charges from bulk phases of Si and  $\text{Si}_3\text{N}_4$  are marked in the inset of respective plots.

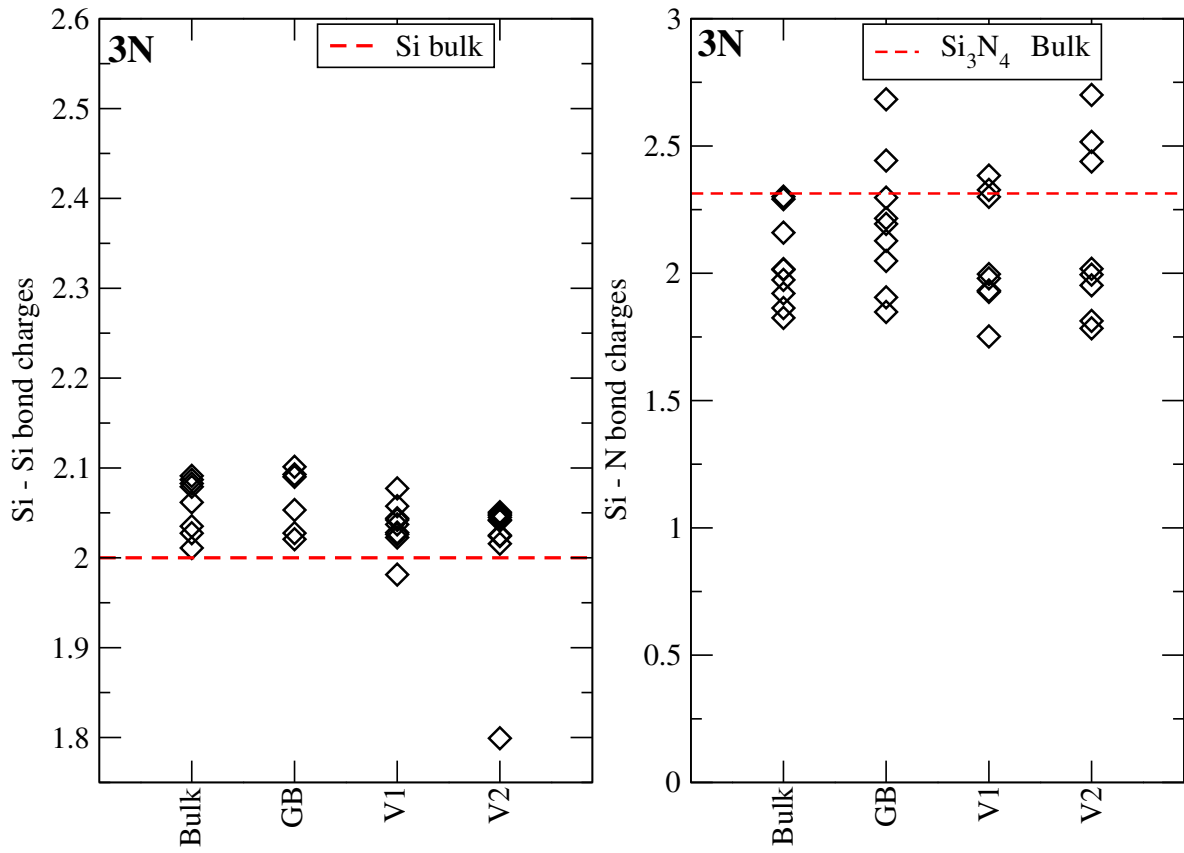

Figure 4: Bond charge variation of Si-Si and Si-N for the inclusion of three nitrogen atoms in Si-bulk, Si-GB and in presence of vacancy V1 and V2. As a reference, Si-Si/Si-N bond charges from bulk phases of Si and Si<sub>3</sub>N<sub>4</sub> are marked in the inset of respective plots.

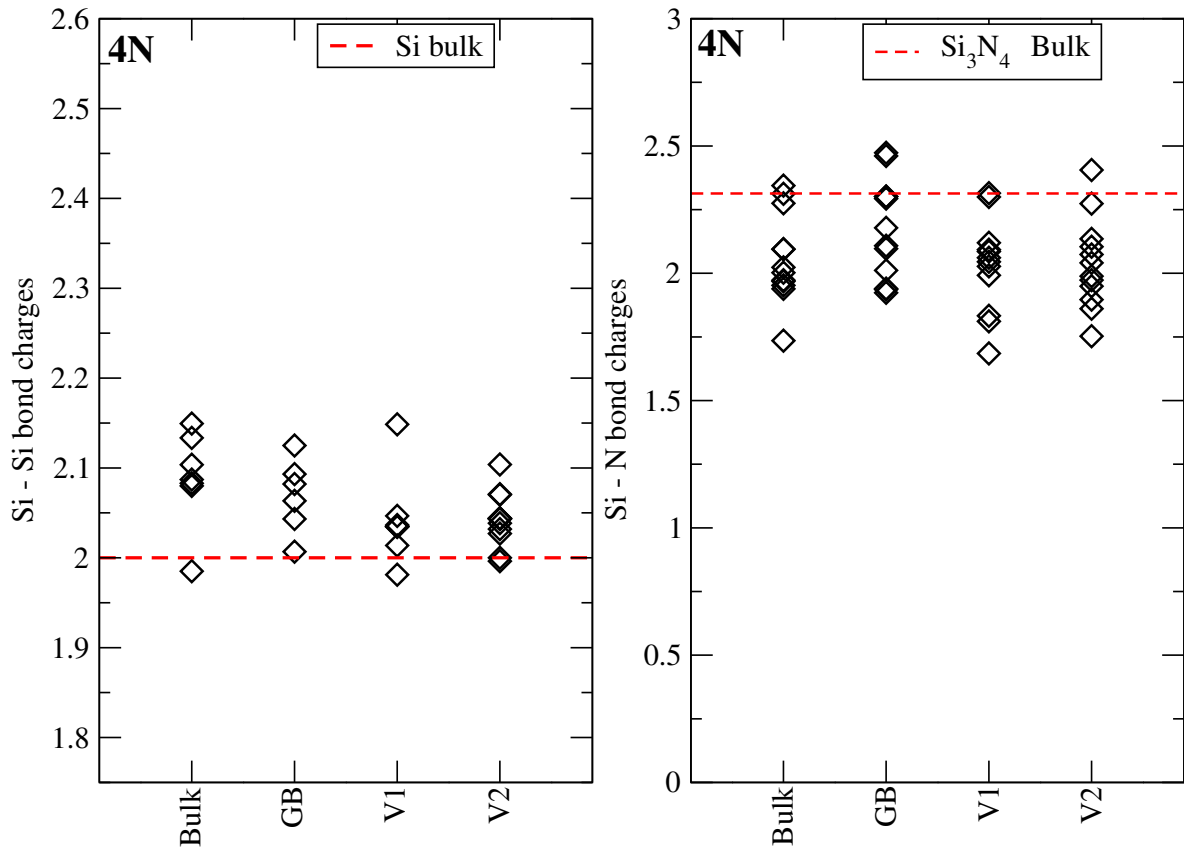

Figure 5: Bond charge variation of Si-Si and Si-N for the inclusion of four nitrogen atoms in Si-bulk, Si-GB and in presence of vacancy V1 and V2. As a reference, Si-Si/Si-N bond charges from bulk phases of Si and Si<sub>3</sub>N<sub>4</sub> are marked in the inset of respective plots.

## 5.2 Oxygen

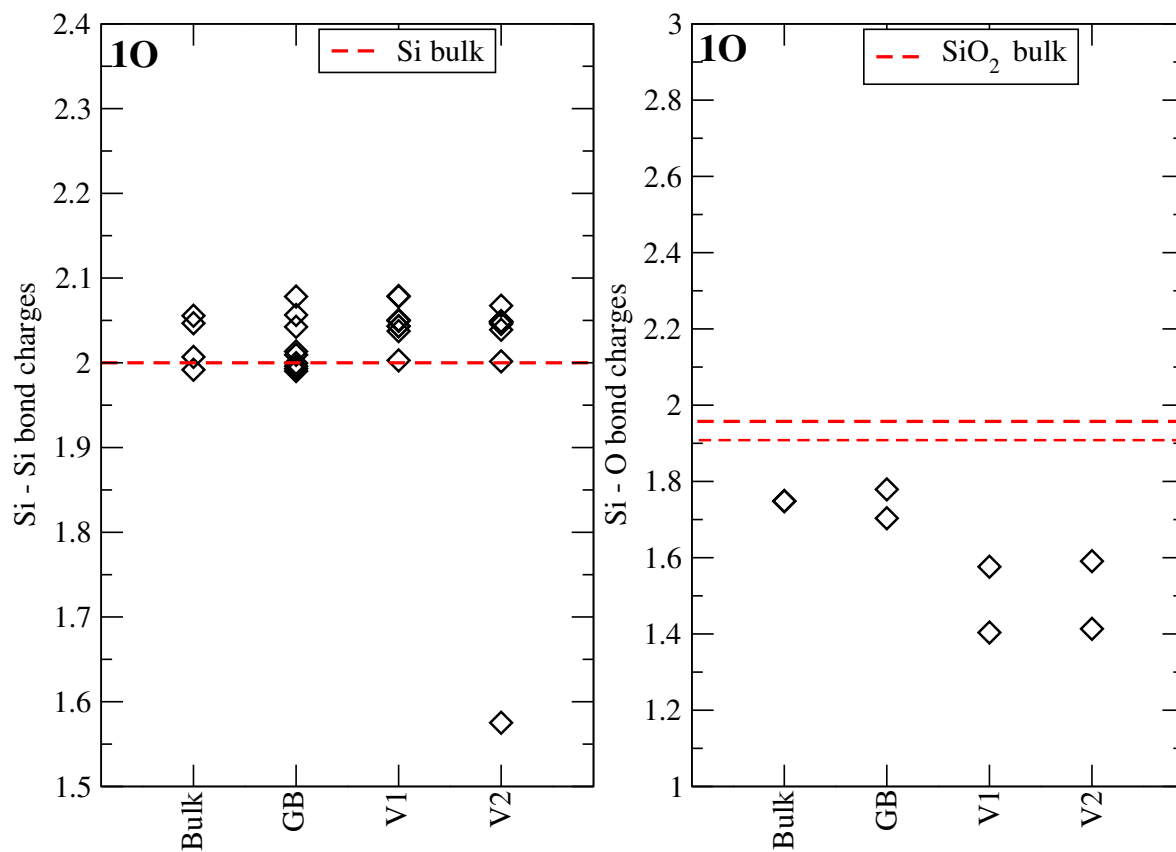

Figure 6: Bond charge variation of Si-Si and Si-O for the inclusion of one oxygen atom in Si-bulk, Si-GB and in presence of vacancy V1 and V2. As a reference, Si-Si/Si-O bond charges from bulk phases of Si and SiO<sub>2</sub> are marked in the inset of respective plots.

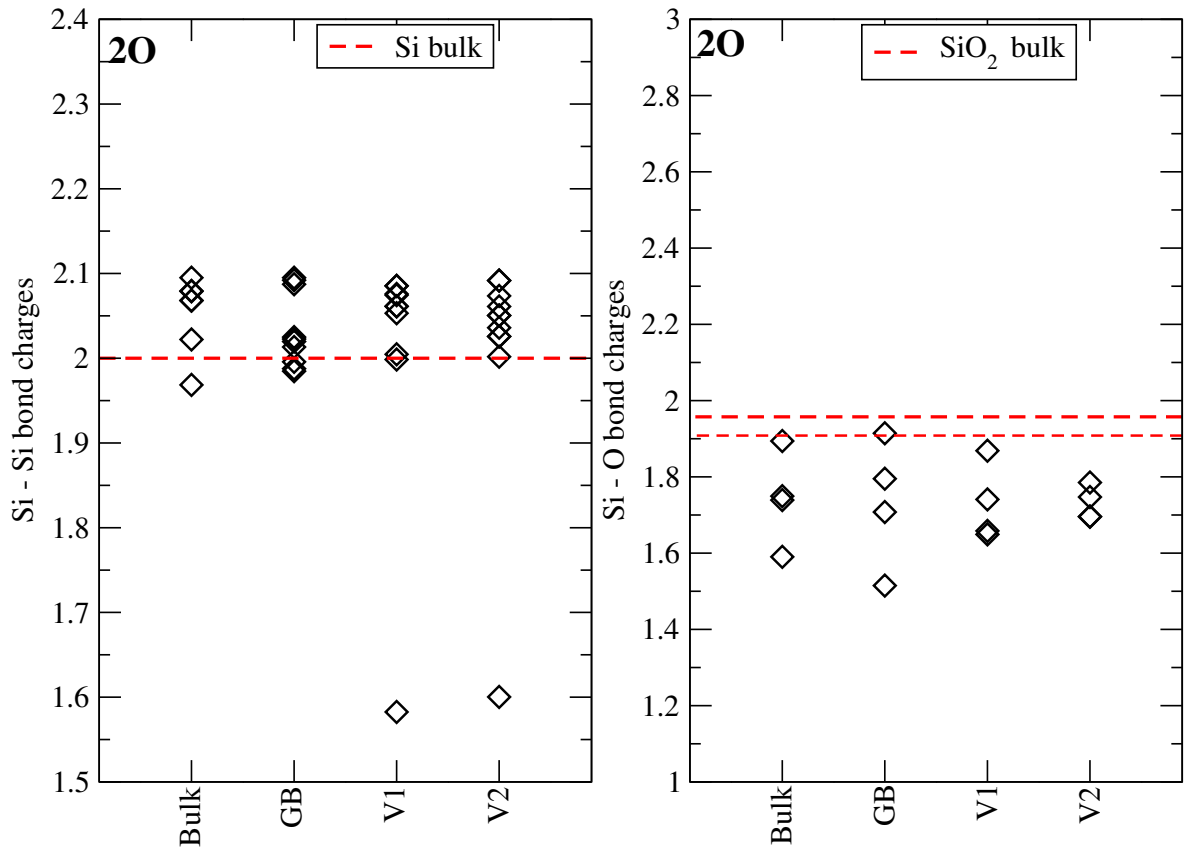

Figure 7: Bond charge variation of Si-Si and Si-O for the inclusion of two oxygen atoms in Si-bulk, Si-GB and in presence of vacancy V1 and V2. As a reference, Si-Si/Si-O bond charges from bulk phases of Si and SiO<sub>2</sub> are marked in the inset of respective plots.



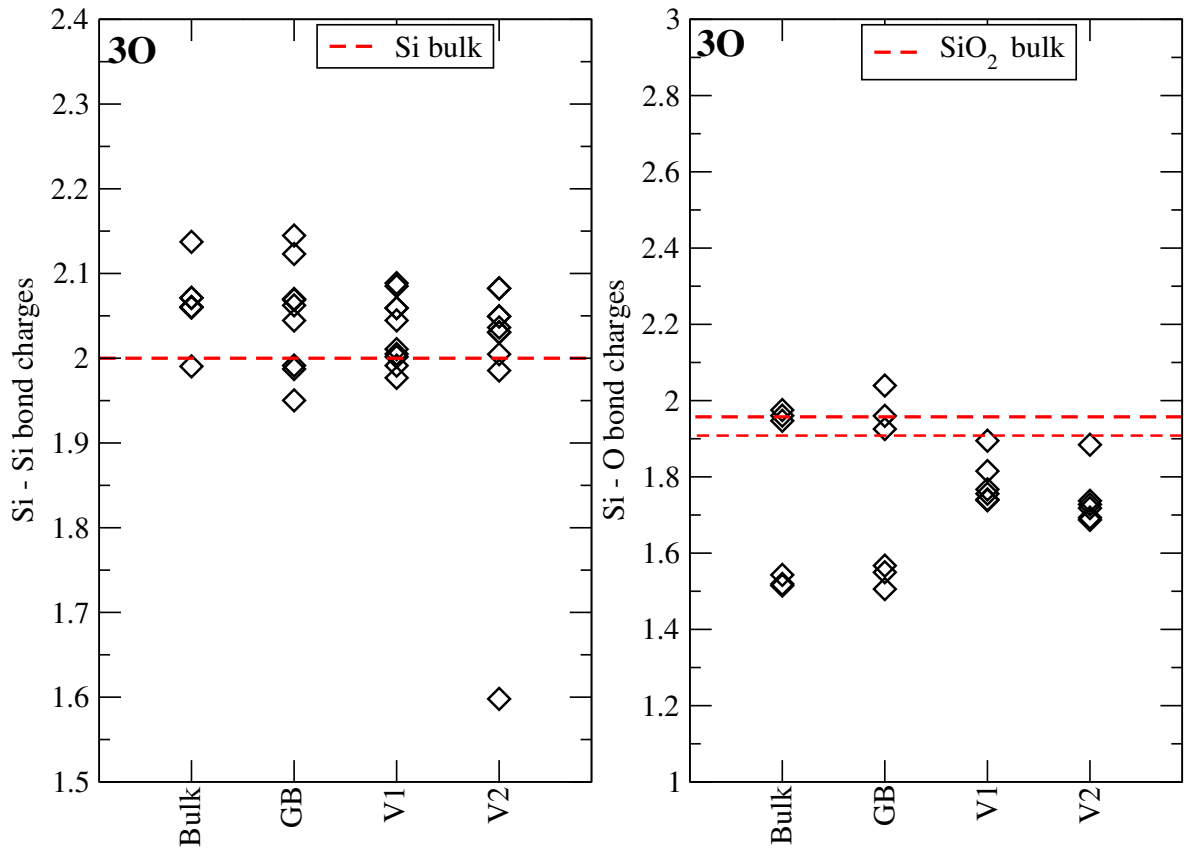

Figure 8: Bond charge variation of Si-Si and Si-O for the inclusion of three oxygen atoms in Si-bulk, Si-GB and in presence of vacancy V1 and V2. As a reference, Si-Si/Si-O bond charges from bulk phases of Si and SiO<sub>2</sub> are marked in the inset of respective plots.

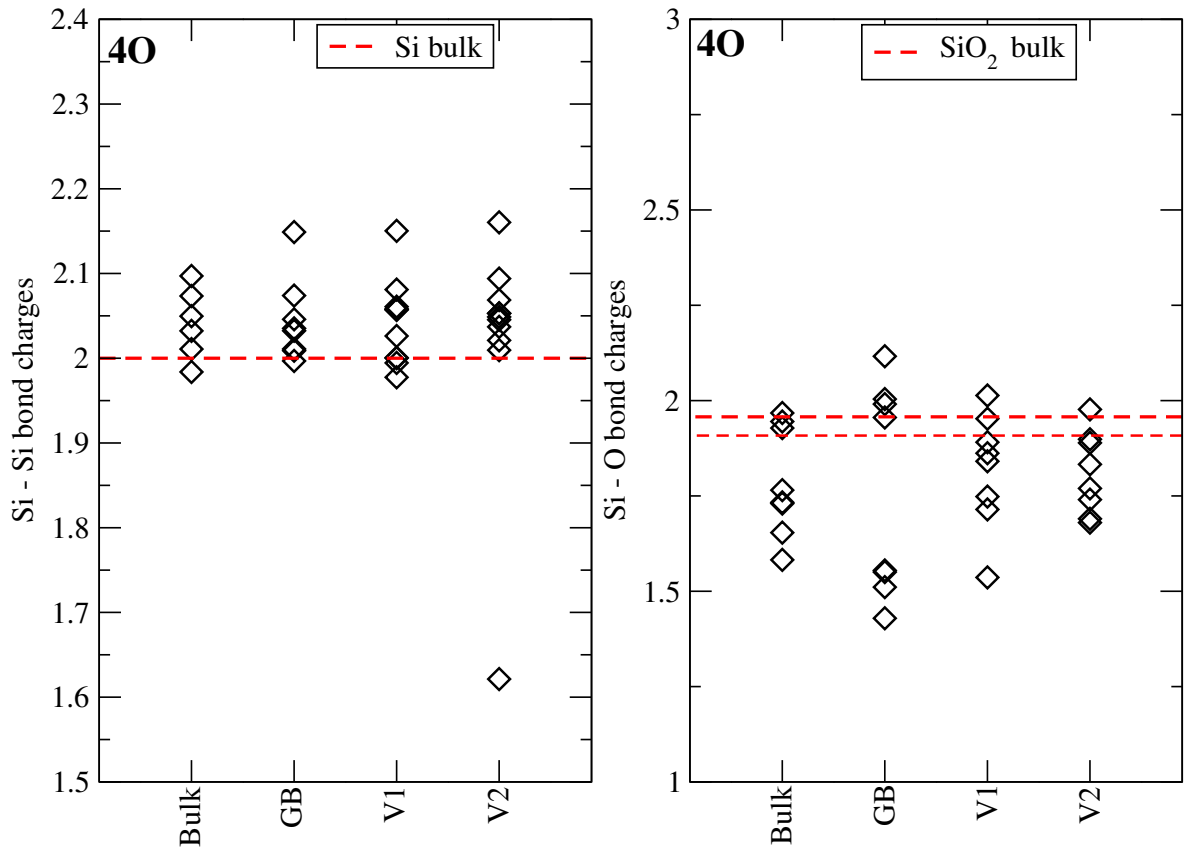

Figure 9: Bond charge variation of Si-Si and Si-O for the inclusion of four oxygen atoms in Si-bulk, Si-GB and in presence of vacancy V1 and V2. As a reference, Si-Si/Si-O bond charges from bulk phases of Si and SiO<sub>2</sub> are marked in the inset of respective plots.

## 6 Bond length variations

### 6.1 Carbon

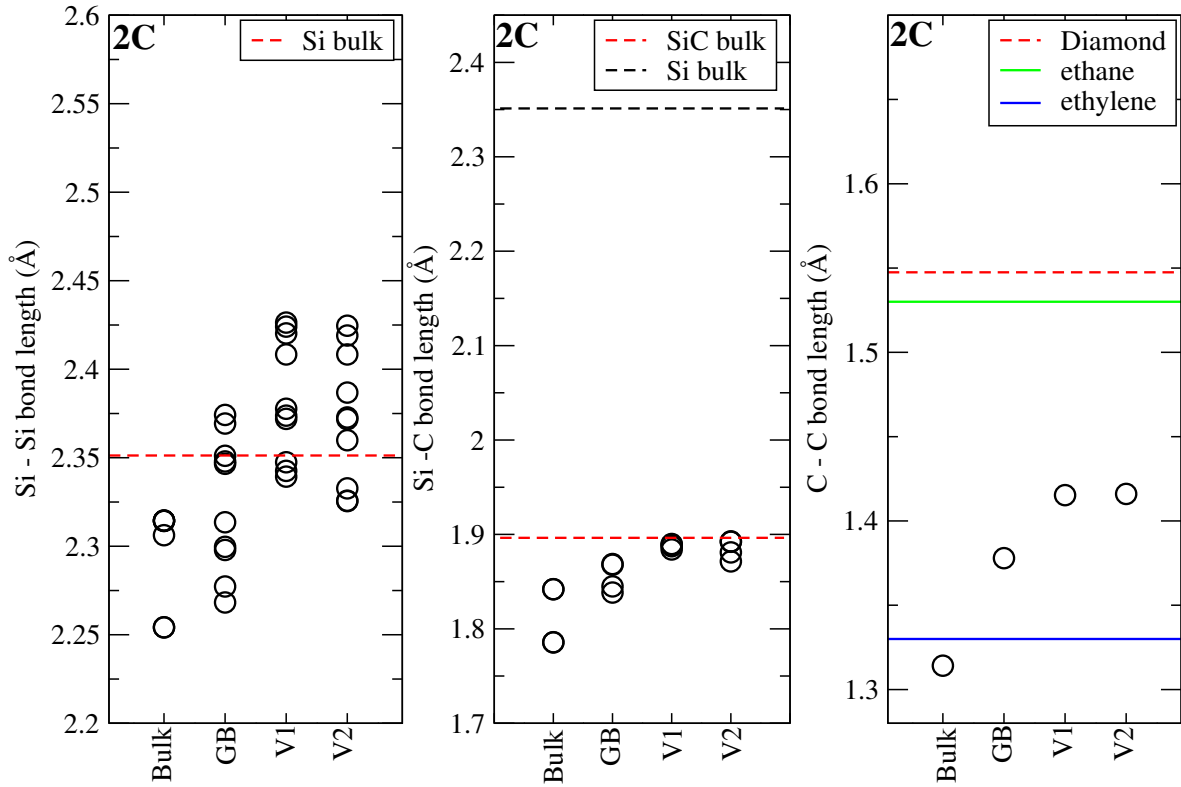

Figure 10: Bond length variation of Si-Si, Si-C and C-C for the inclusion of two carbon atoms in Si-bulk, Si-GB and in presence of vacancy V1 and V2. As a reference, Si-Si/Si-C/C-C bond length from bulk phases of Si, SiC, diamond and molecular systems ethylene and ethane are marked in the inset of respective plots.

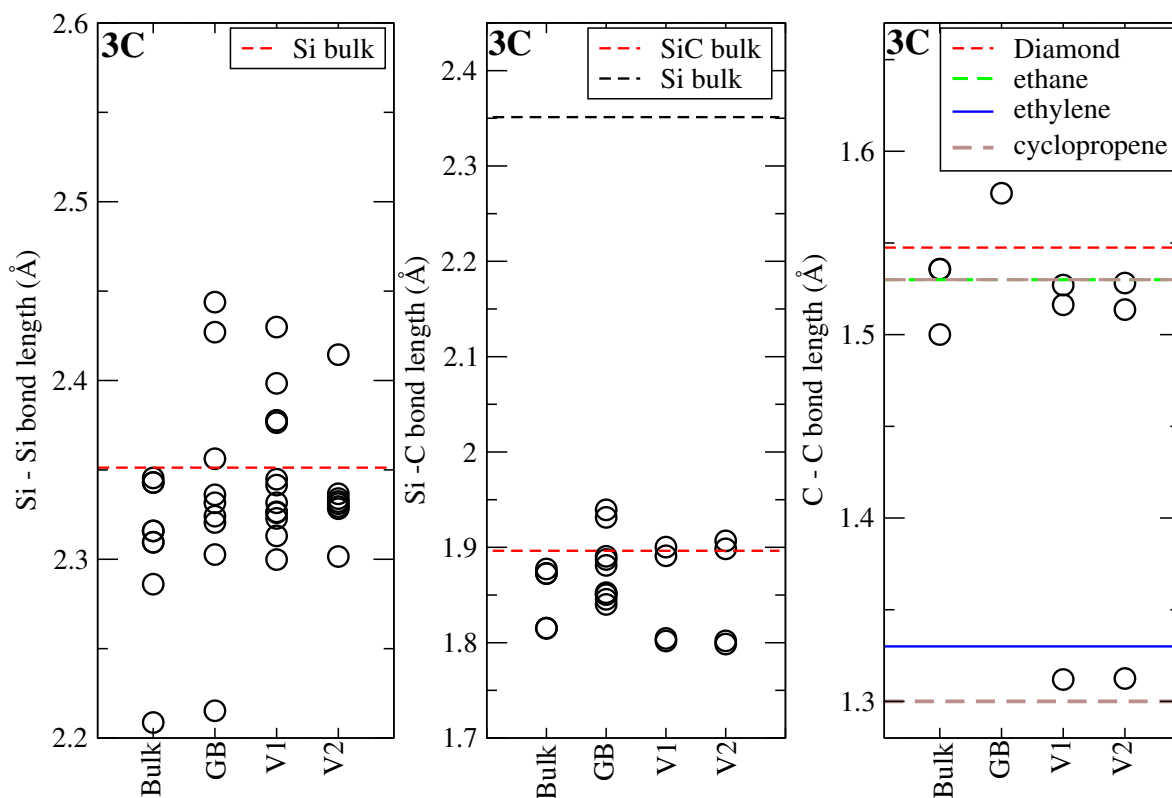

Figure 11: Bond length variation of Si-Si, Si-C and C-C for the inclusion of three carbon atoms in Si-bulk, Si-GB and in presence of vacancy V1 and V2. As a reference, Si-Si/Si-C/C-C bond length from bulk phases of Si, SiC, diamond and molecular systems ethylene, ethane, and cyclopropene are marked in the inset of respective plots

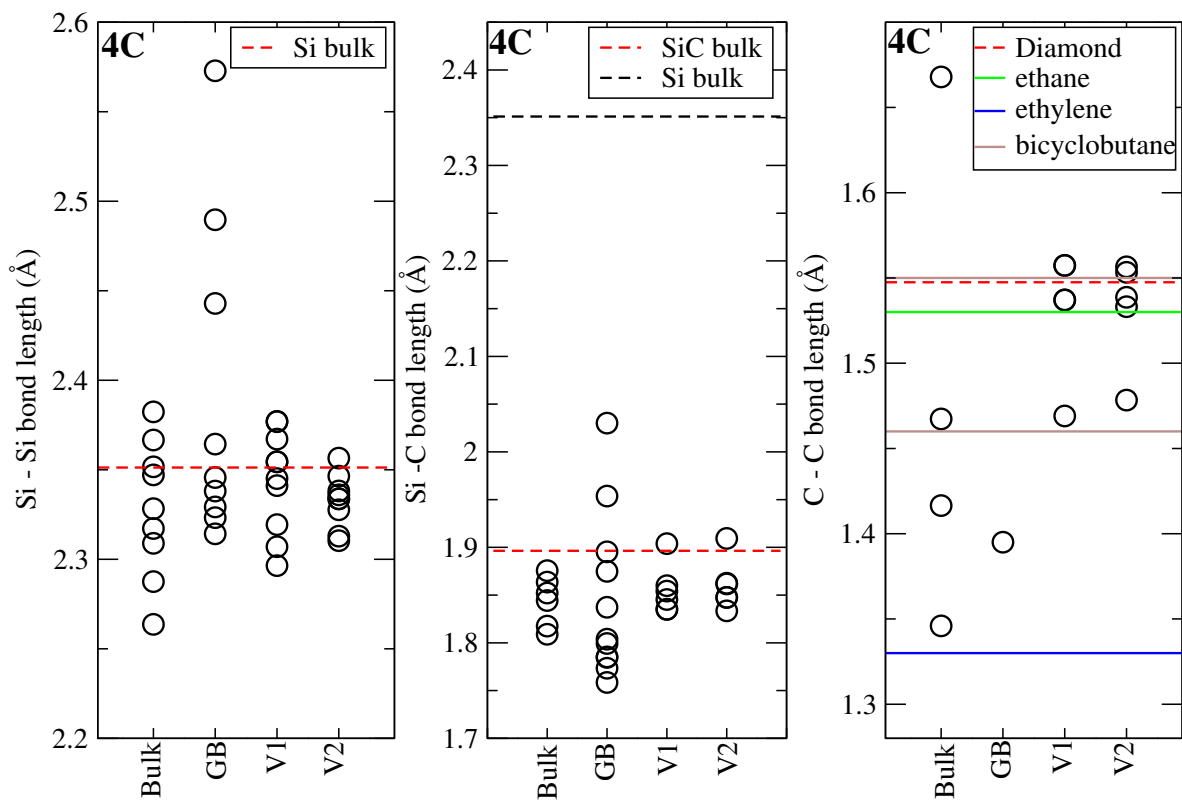

Figure 12: Bond length variation of Si-Si, Si-C and C-C for the inclusion of four carbon atoms in Si-bulk, Si-GB and in presence of vacancy V1 and V2. As a reference, Si-Si/Si-C/C-C bond length from bulk phases of Si, SiC, diamond and molecular systems ethylene, ethane, and bicyclobutane are marked in the inset of respective plots

## 6.2 Nitrogen

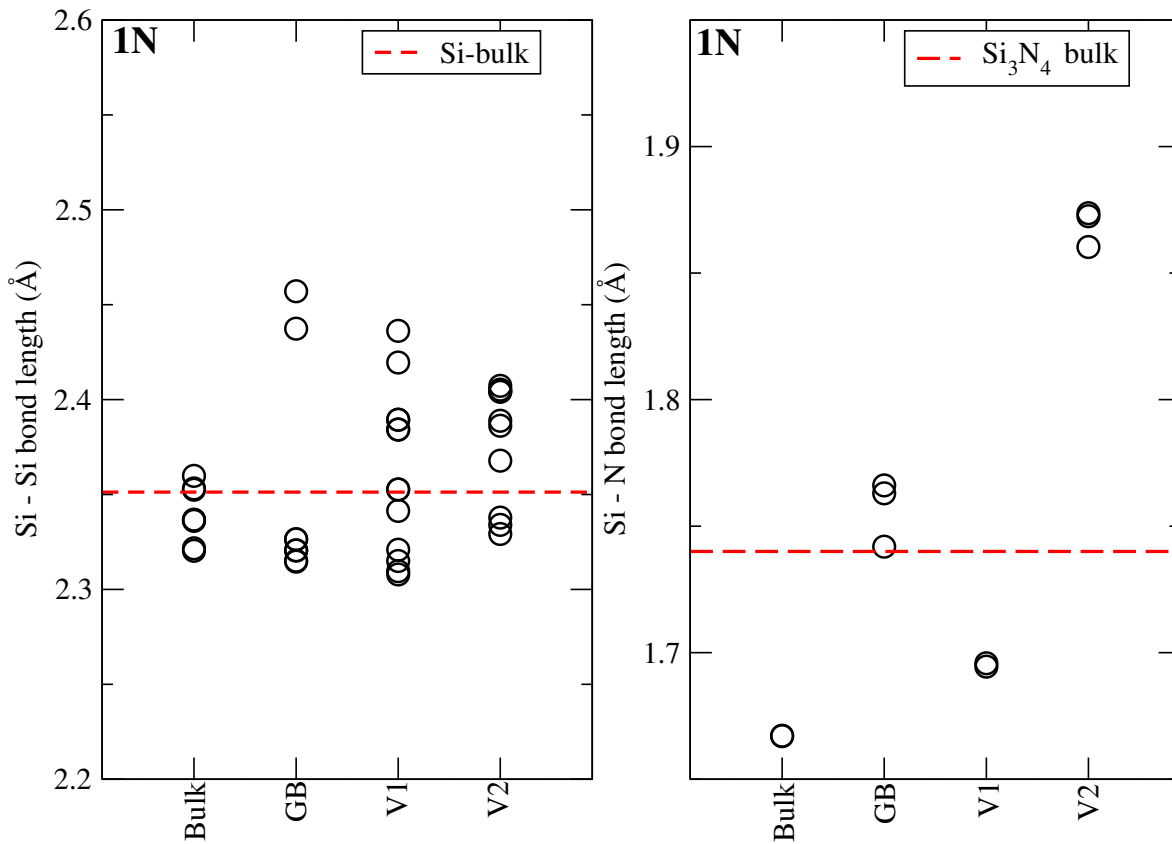

Figure 13: Bond length variation of Si-Si and Si-N for the inclusion of one nitrogen atom in Si-bulk, Si-GB and in presence of vacancy V1 and V2. As a reference, Si-Si/Si-N bond length from bulk phases of Si, Si<sub>3</sub>N<sub>4</sub> are marked in the inset of respective plots.

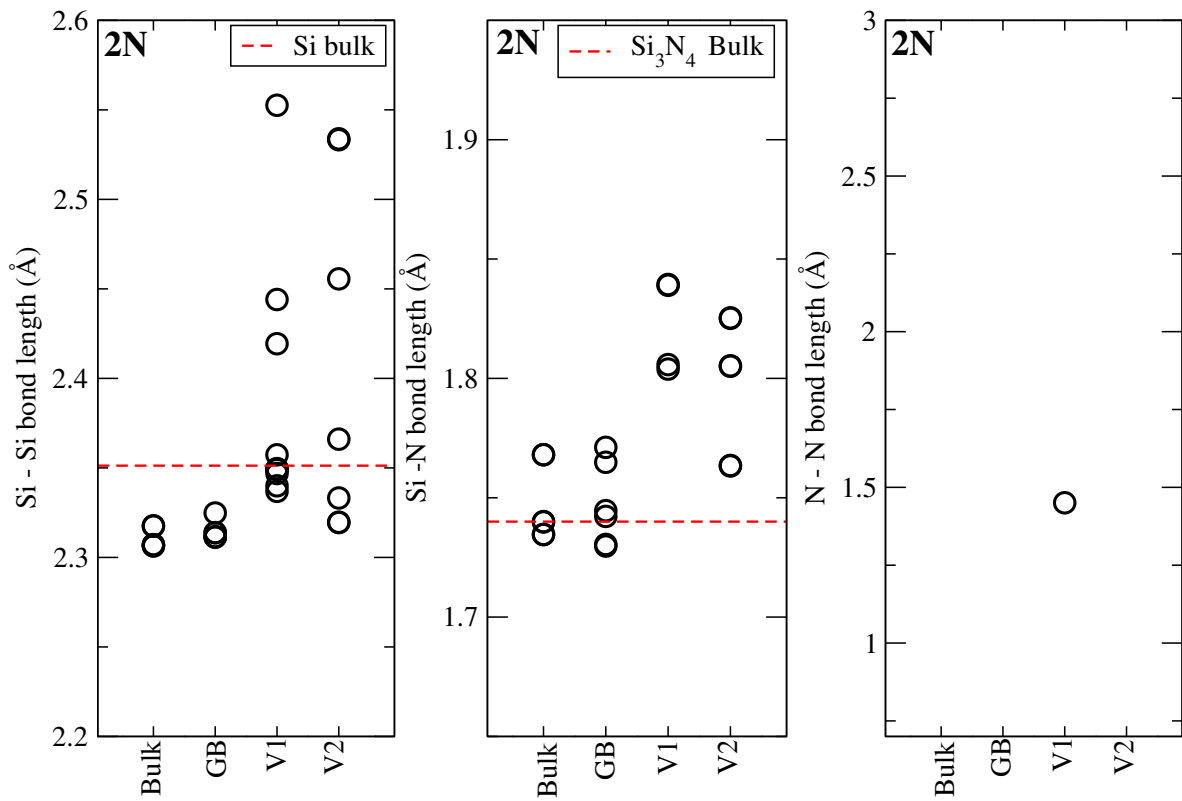

Figure 14: Bond length variation of Si-Si, Si-N and N-N for the inclusion of two nitrogen atoms in Si-bulk, Si-GB and in presence of vacancy V1 and V2. As a reference, Si-Si/Si-N bond length from bulk phases of Si, Si<sub>3</sub>N<sub>4</sub> are marked in the inset of respective plots.

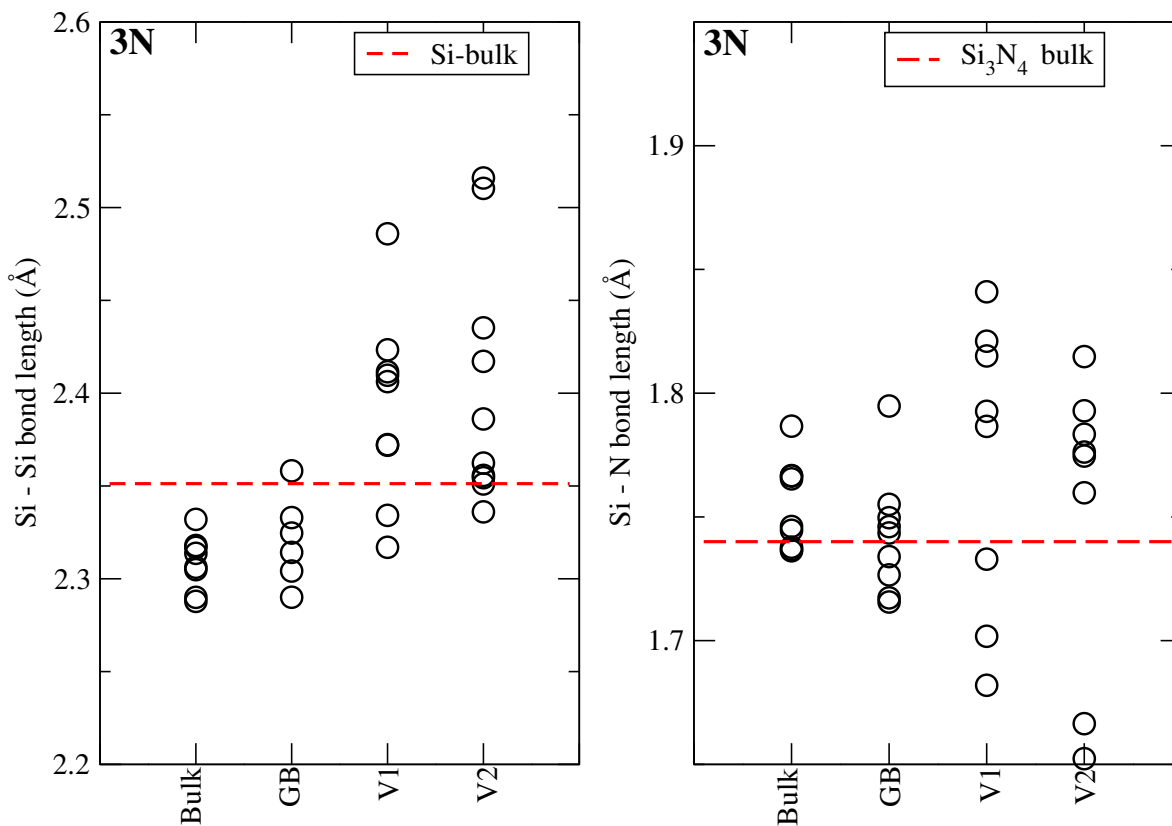

Figure 15: Bond length variation of Si-Si and Si-N for the inclusion of three nitrogen atom in Si-bulk, Si-GB and in presence of vacancy V1 and V2. As a reference, Si-Si/Si-N bond length from bulk phases of Si, Si<sub>3</sub>N<sub>4</sub> are marked in the inset of respective plots.



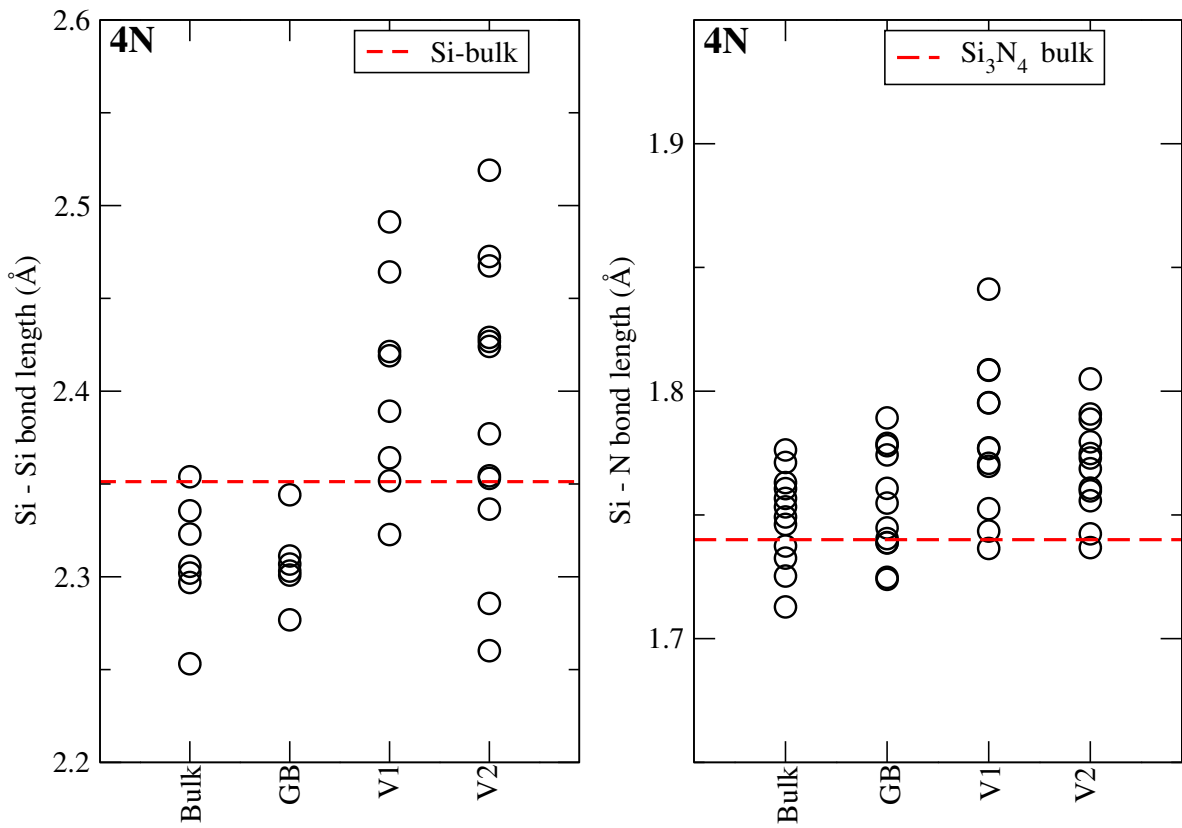

Figure 16: Bond length variation of Si-Si and Si-N for the inclusion of four nitrogen atom in Si-bulk, Si-GB and in presence of vacancy V1 and V2. As a reference, Si-Si/Si-N bond length from bulk phases of Si, Si<sub>3</sub>N<sub>4</sub> are marked in the inset of respective plots.

### 6.3 Oxygen

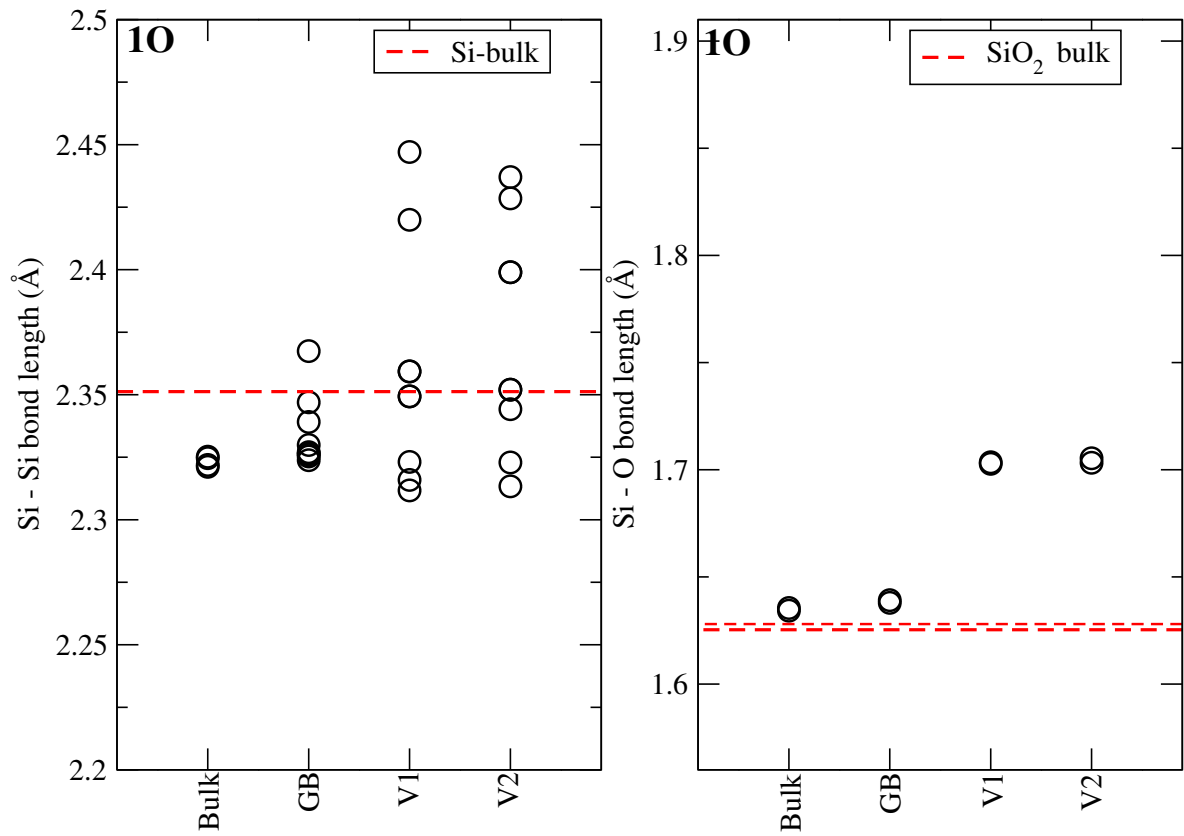

Figure 17: Bond length variation of Si-Si and Si-O for the inclusion of one oxygen atom in Si-bulk, Si-GB and in presence of vacancy V1 and V2. As a reference, Si-Si/Si-O bond length from bulk phases of Si, SiO<sub>2</sub> are marked in the inset of respective plots.

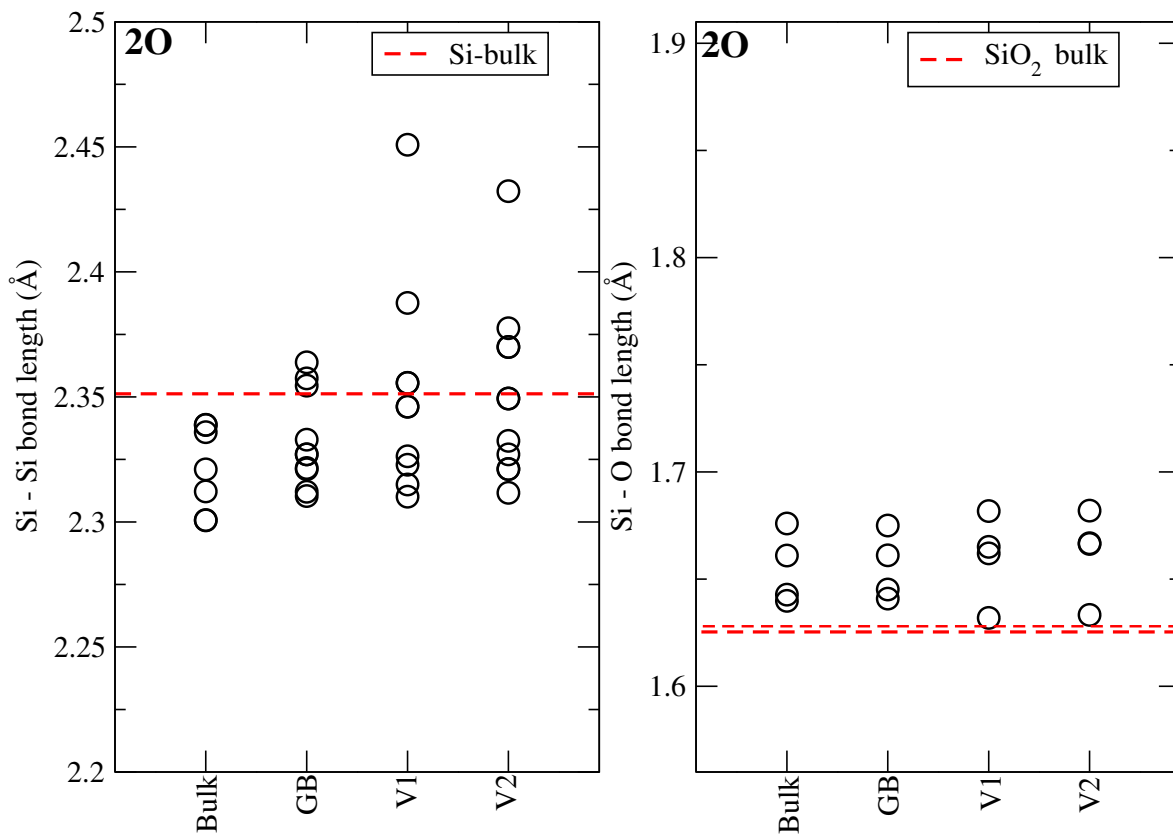

Figure 18: Bond length variation of Si-Si and Si-O for the inclusion of two oxygen atoms in Si-bulk, Si-GB and in presence of vacancy V1 and V2. As a reference, Si-Si/Si-O bond length from bulk phases of Si, SiO<sub>2</sub> are marked in the inset of respective plots.

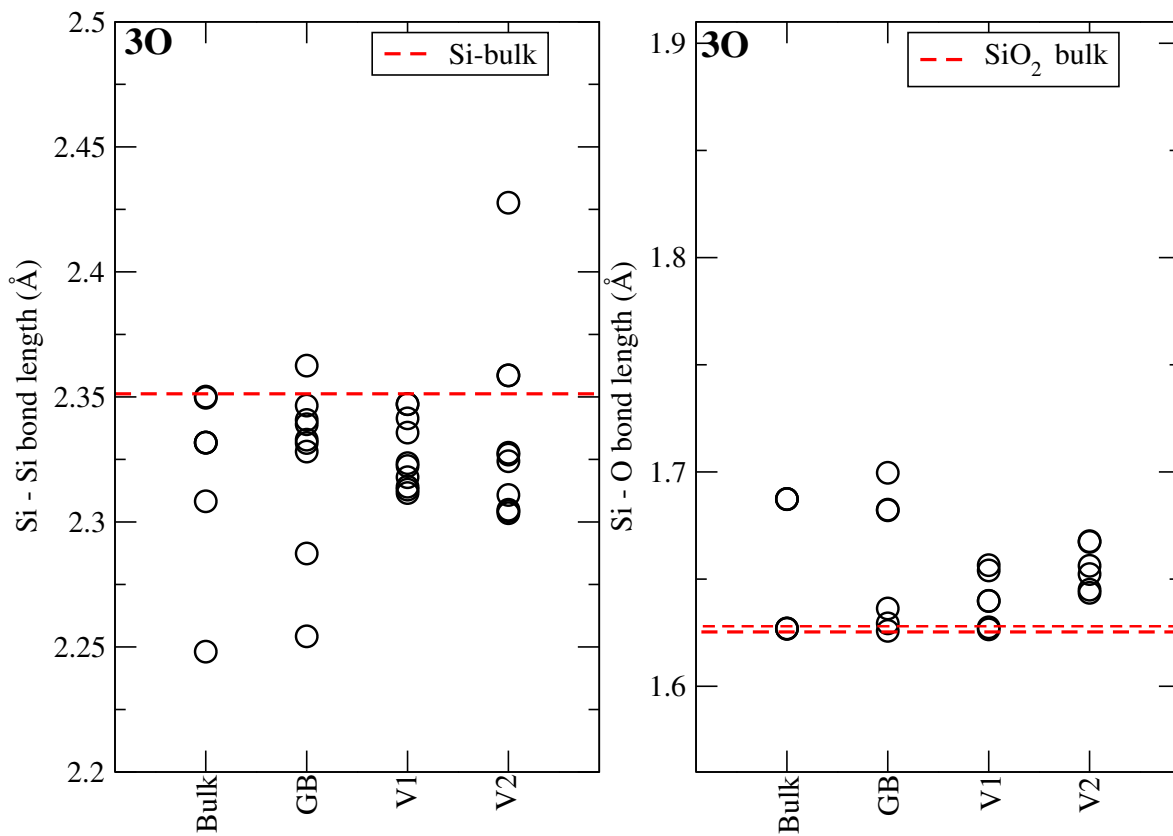

Figure 19: Bond length variation of Si-Si and Si-O for the inclusion of three oxygen atoms in Si-bulk, Si-GB and in presence of vacancy V1 and V2. As a reference, Si-Si/Si-O bond length from bulk phases of Si, SiO<sub>2</sub> are marked in the inset of respective plots.

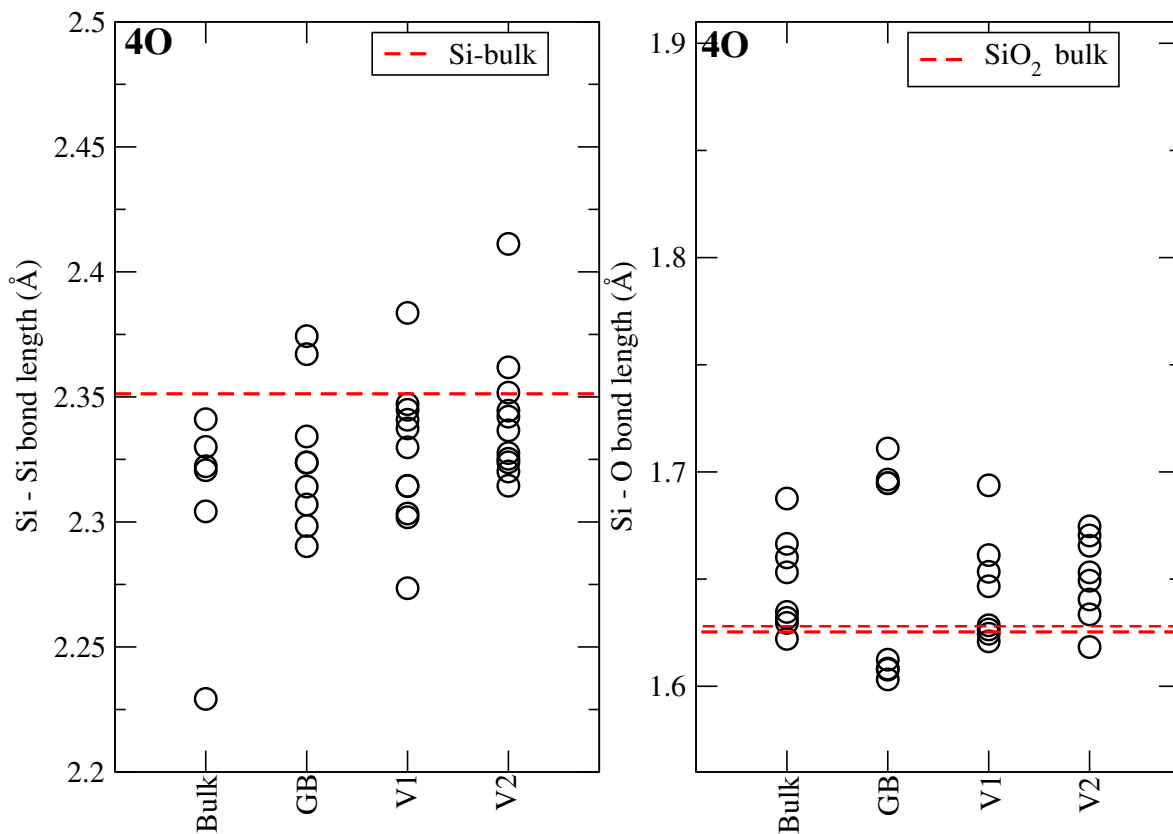

Figure 20: Bond length variation of Si-Si and Si-O for the inclusion of four oxygen atoms in Si-bulk, Si-GB and in presence of vacancy V1 and V2. As a reference, Si-Si/Si-O bond length from bulk phases of Si, SiO<sub>2</sub> are marked in the inset of respective plots.
